# Supplementary material for: Protonated and deprotonated vanadyl imidazole tartrates for the mimics of the vanadium coordination in the FeV-cofactor of V-nitrogenase
Source: Royal Society of Chemistry journal article supplement (doi:10.1039/d3dt02903d), 2023-01-01
Supplement: d3dt02903d1.pdf [file d3dt02903d1.pdf]

## Supporting materials

### Protonated and deprotonated vanadyl imidazole tartrates for the mimics of the vanadium coordination in FeV-cofactor of V-nitrogenase

Shuang-Shuang Zhu,<sup>‡a</sup> Zhen-Lang Xie,<sup>‡a</sup> Lan Deng,<sup>a</sup> Si-Yuan Wang,<sup>a</sup> Lu-Bin Ni,<sup>b</sup> Zhao-Hui Zhou<sup>\*a</sup>

<sup>a</sup>State Key Laboratory of Physical Chemistry of Solid Surfaces and Department of Chemistry, College of Chemistry and Chemical Engineering, Xiamen University, Xiamen, 361005, China. Tel: + 86-592-2184531; Fax: + 86-592-2183047; Email: zhzhou@xmu.edu.cn

<sup>b</sup>School of Chemistry and Chemical Engineering, Yangzhou University, Yangzhou 225002 Jiangsu, China.

<sup>‡</sup>These authors contributed equally to this work.

#### Figure and Table Options

|                                                                                                                                                                                                                                                                                                     |    |
|-----------------------------------------------------------------------------------------------------------------------------------------------------------------------------------------------------------------------------------------------------------------------------------------------------|----|
| <b>Figure S1.</b> 2D layered structure of $(\text{H}_2\text{im})_2[\Delta, \Lambda\text{-V}^{\text{IV}}_2\text{O}_2(\text{R,R-H}_2\text{tart})(\text{R,R-tart})(\text{Him})_2] \cdot \text{Him}$ ( <b>1</b> ).<br>.....                                                                             | 4  |
| <b>Figure S2.</b> 2D layered structure of $[\Lambda, \Lambda\text{-V}^{\text{IV}}_2\text{O}_2(\text{R,R-tart})(\text{Him})_6] \cdot 4\text{H}_2\text{O}$ ( <b>2</b> ).<br>.....                                                                                                                     | 5  |
| <b>Figure S3.</b> ORTEP plot of the anion structure $(\text{H}_2\text{im})_2[\Lambda, \Delta\text{-V}^{\text{IV}}_2\text{O}_2(\text{S,S-H}_2\text{tart})(\text{S,S-tart})(\text{Him})_2] \cdot \text{Him}$ ( <b>3</b> ) at the 30% probability levels. ....                                         | 6  |
| <b>Figure S4.</b> ORTEP plot of the molecular structure $[\Delta, \Delta\text{-V}^{\text{IV}}_2\text{O}_2(\text{S,S-tart})(\text{Him})_6] \cdot 4\text{H}_2\text{O}$ ( <b>4</b> ) at the 30% probability levels. ....                                                                               | 7  |
| <b>Figure S5.</b> Chemdraw structures for oxidovanadium tartrates <b>5 – 8</b> , other oxidovanadium hydroxycarboxylates <b>9 – 16</b> and reported FeV-cos <b>17 – 21</b> . ....                                                                                                                   | 8  |
| <b>Figure S6.</b> FT-IR spectrum of <i>R,R</i> -tartaric acid originated from Spectral Database for Organic Compounds SDBS. URL for this compound: <a href="https://sdb.sdb.aist.go.jp/sdb/cgi-bin/landingpage?sdbno=1071">https://sdb.sdb.aist.go.jp/sdb/cgi-bin/landingpage?sdbno=1071</a> . .... | 9  |
| <b>Figure S7.</b> FT-IR spectrum of <i>S,S</i> -tartaric acid originated from Spectral Database for Organic Compounds SDBS. URL for this compound: <a href="https://sdb.sdb.aist.go.jp/sdb/cgi-bin/landingpage?sdbno=488">https://sdb.sdb.aist.go.jp/sdb/cgi-bin/landingpage?sdbno=488</a> . ....   | 10 |
| <b>Figure S8a.</b> VCD and IR spectra of $(\text{H}_2\text{im})_2[\Delta, \Lambda\text{-V}^{\text{IV}}_2\text{O}_2(\text{R,R-H}_2\text{tart})(\text{R,R-tart})(\text{Him})_2] \cdot \text{Him}$ ( <b>1</b> ) with KBr pellet. ....                                                                  | 11 |

|                                                                                                                                                                                                                                                                                                                                                                                                                                                                                                                                                                                                                                                                                                                                                                                                                                                                                                                                             |    |
|---------------------------------------------------------------------------------------------------------------------------------------------------------------------------------------------------------------------------------------------------------------------------------------------------------------------------------------------------------------------------------------------------------------------------------------------------------------------------------------------------------------------------------------------------------------------------------------------------------------------------------------------------------------------------------------------------------------------------------------------------------------------------------------------------------------------------------------------------------------------------------------------------------------------------------------------|----|
| <b>Figure S8b.</b> VCD and IR spectra of $[\Lambda,\Lambda\text{-V}^{\text{IV}}_2\text{O}_2(R,R\text{-tart})(\text{Him})_6]\cdot 4\text{H}_2\text{O}$ ( <b>2</b> ) with KBr pellet. ....                                                                                                                                                                                                                                                                                                                                                                                                                                                                                                                                                                                                                                                                                                                                                    | 12 |
| <b>Figure S8c.</b> VCD and IR spectra of $(\text{H}_2\text{im})_2[\Lambda,\Lambda\text{-V}^{\text{IV}}_2\text{O}_2(S,S\text{-H}_2\text{tart})(S,S\text{-tart})(\text{Him})_2]\cdot \text{Him}$ ( <b>3</b> ) with KBr pellet. ....                                                                                                                                                                                                                                                                                                                                                                                                                                                                                                                                                                                                                                                                                                           | 13 |
| <b>Figure S8d.</b> VCD and IR spectra of $[\Delta,\Delta\text{-V}^{\text{IV}}_2\text{O}_2(S,S\text{-tart})(\text{Him})_6]\cdot 4\text{H}_2\text{O}$ ( <b>4</b> ) with KBr pellet. ....                                                                                                                                                                                                                                                                                                                                                                                                                                                                                                                                                                                                                                                                                                                                                      | 14 |
| <b>Figure S9.</b> X-band EPR spectra of <b>1</b> and <b>3</b> in solid-states (a) and <b>1</b> in $\text{H}_2\text{O}$ (b) at 298 K, respectively.....                                                                                                                                                                                                                                                                                                                                                                                                                                                                                                                                                                                                                                                                                                                                                                                      | 15 |
| <b>Figure S10.</b> X-band EPR spectra with <i>g</i> -axis in solid state of <b>1</b> – <b>4</b> at 298 K, respectively... 16                                                                                                                                                                                                                                                                                                                                                                                                                                                                                                                                                                                                                                                                                                                                                                                                                |    |
| <b>Figure S11.</b> Temperature-dependence magnetic susceptibility of <b>2</b> in an applied field of $B = 0.1$ T over the range of 2 – 300 K. Red line correspond to the best fitting result.....                                                                                                                                                                                                                                                                                                                                                                                                                                                                                                                                                                                                                                                                                                                                           | 17 |
| <b>Figure S12.</b> IR spectra of $(\text{H}_2\text{im})_2[\Delta,\Lambda\text{-V}^{\text{IV}}_2\text{O}_2(R,R\text{-H}_2\text{tart})(R,R\text{-tart})(\text{Him})_2]\cdot \text{Him}$ ( <b>1</b> ), $[\Lambda,\Lambda\text{-V}^{\text{IV}}_2\text{O}_2(R,R\text{-tart})(\text{Him})_6]\cdot 4\text{H}_2\text{O}$ ( <b>2</b> ), $(\text{H}_2\text{im})_2[\Lambda,\Delta\text{-V}^{\text{IV}}_2\text{O}_2(S,S\text{-H}_2\text{tart})(S,S\text{-tart})(\text{Him})_2]\cdot \text{Him}$ ( <b>3</b> ) and $[\Delta,\Delta\text{-V}^{\text{IV}}_2\text{O}_2(S,S\text{-tart})(\text{Him})_6]\cdot 4\text{H}_2\text{O}$ ( <b>4</b> ), respectively.....                                                                                                                                                                                                                                                                                             | 18 |
| <b>Figure S13.</b> (a) Diffused reflectance UV-Vis spectra of solids $(\text{H}_2\text{im})_2[\Delta,\Lambda\text{-V}^{\text{IV}}_2\text{O}_2(R,R\text{-H}_2\text{tart})(R,R\text{-tart})(\text{Him})_2]\cdot \text{Him}$ ( <b>1</b> ), $[\Lambda,\Lambda\text{-V}^{\text{IV}}_2\text{O}_2(R,R\text{-tart})(\text{Him})_6]\cdot 4\text{H}_2\text{O}$ ( <b>2</b> ), $(\text{H}_2\text{im})_2[\Lambda,\Delta\text{-V}^{\text{IV}}_2\text{O}_2(S,S\text{-H}_2\text{tart})(S,S\text{-tart})(\text{Him})_2]\cdot \text{Him}$ ( <b>3</b> ) and $[\Delta,\Delta\text{-V}^{\text{IV}}_2\text{O}_2(S,S\text{-tart})(\text{Him})_6]\cdot 4\text{H}_2\text{O}$ ( <b>4</b> ), respectively. (b) Comparisons for solid and solution UV-Vis spectrum of $[\Lambda,\Lambda\text{-V}^{\text{IV}}_2\text{O}_2(R,R\text{-tart})(\text{Him})_6]\cdot 4\text{H}_2\text{O}$ ( <b>2</b> ) in water (inset: UV-Vis spectra with local amplification regions). .... | 19 |
| <b>Figure S14.</b> TG–DTG curves of $(\text{H}_2\text{im})_2[\Delta,\Lambda\text{-V}^{\text{IV}}_2\text{O}_2(R,R\text{-H}_2\text{tart})(R,R\text{-tart})(\text{Him})_2]\cdot \text{Him}$ ( <b>1</b> , a); TG–DTG curves of $[\Lambda,\Lambda\text{-V}^{\text{IV}}_2\text{O}_2(R,R\text{-tart})(\text{Him})_6]\cdot 4\text{H}_2\text{O}$ ( <b>2</b> , b); TG–DTG curves of $(\text{H}_2\text{im})_2[\Lambda,\Delta\text{-V}^{\text{IV}}_2\text{O}_2(S,S\text{-H}_2\text{tart})(S,S\text{-tart})(\text{Him})_2]\cdot \text{Him}$ ( <b>3</b> , c); TG–DTG curves of $[\Delta,\Delta\text{-V}^{\text{IV}}_2\text{O}_2(S,S\text{-tart})(\text{Him})_6]\cdot 4\text{H}_2\text{O}$ ( <b>4</b> , d). ....                                                                                                                                                                                                                                           | 20 |
| <b>Figure S15.</b> Cyclic voltammogram of $[\Lambda,\Lambda\text{-V}_2\text{O}_2(R,R\text{-tart})(\text{Him})_6]\cdot 4\text{H}_2\text{O}$ ( <b>2</b> ) in anhydrous DMF with 0.10 M $[\text{n-Bu}_4\text{N}]\text{ClO}_4$ at a glassy carbon electrode with scan rate of $50 \text{ mV}\cdot\text{s}^{-1}$ (a) and various scan rates (b), respectively. (c) Plots of redox peak currents against $v^{1/2}$ . (d) Differential pulse voltammogram of <b>2</b> .....                                                                                                                                                                                                                                                                                                                                                                                                                                                                        | 21 |
| <b>Figure S16.</b> Comparison of the observed PXRD (red) with the simulated patterns (black) calculated from the crystal data for $[\Lambda,\Lambda\text{-V}^{\text{IV}}_2\text{O}_2(R,R\text{-tart})(\text{Him})_6]\cdot 4\text{H}_2\text{O}$ ( <b>2</b> ). ....                                                                                                                                                                                                                                                                                                                                                                                                                                                                                                                                                                                                                                                                           | 22 |
| <b>Table S1.</b> Crystallographic data and structural refinements for complexes $(\text{H}_2\text{im})_2[\Delta,\Lambda\text{-V}^{\text{IV}}_2\text{O}_2(R,R\text{-H}_2\text{tart})(R,R\text{-tart})(\text{Him})_2]\cdot \text{Him}$ ( <b>1</b> ), $[\Lambda,\Lambda\text{-V}^{\text{IV}}_2\text{O}_2(R,R\text{-tart})(\text{Him})_6]\cdot 4\text{H}_2\text{O}$ ( <b>2</b> ), $(\text{H}_2\text{im})_2[\Lambda,\Delta\text{-V}^{\text{IV}}_2\text{O}_2(S,S\text{-H}_2\text{tart})(S,S\text{-tart})(\text{Him})_2]\cdot \text{Him}$ ( <b>3</b> ) and $[\Delta,\Delta\text{-V}^{\text{IV}}_2\text{O}_2(S,S\text{-tart})(\text{Him})_6]\cdot 4\text{H}_2\text{O}$ ( <b>4</b> ), respectively.....                                                                                                                                                                                                                                              | 23 |
| <b>Table S2.</b> Selected hydrogen bonds ( Å ) in $(\text{H}_2\text{im})_2[\Delta,\Lambda\text{-V}^{\text{IV}}_2\text{O}_2(R,R\text{-H}_2\text{tart})(R,R\text{-tart})(\text{Him})_2]\cdot \text{Him}$ ( <b>1</b> ). ....                                                                                                                                                                                                                                                                                                                                                                                                                                                                                                                                                                                                                                                                                                                   | 25 |
| <b>Table S3.</b> Selected hydrogen bonds ( Å ) in $[\Lambda,\Lambda\text{-V}^{\text{IV}}_2\text{O}_2(R,R\text{-tart})(\text{Him})_6]\cdot 4\text{H}_2\text{O}$ ( <b>2</b> ). ....                                                                                                                                                                                                                                                                                                                                                                                                                                                                                                                                                                                                                                                                                                                                                           | 26 |

|                                                                                                                                                                                                                                                                                                                                                                                                                                                                                                                                                                                                                                                                      |    |
|----------------------------------------------------------------------------------------------------------------------------------------------------------------------------------------------------------------------------------------------------------------------------------------------------------------------------------------------------------------------------------------------------------------------------------------------------------------------------------------------------------------------------------------------------------------------------------------------------------------------------------------------------------------------|----|
| <b>Table S4.</b> Selected hydrogen bonds ( Å ) in $(\text{H}_2\text{im})_2[\Lambda,\Delta\text{-V}^{\text{IV}}_2\text{O}_2(\text{S,S-H}_2\text{tart})(\text{S,S-tart})(\text{Him})_2]\cdot\text{Him}$ ( <b>3</b> ).....                                                                                                                                                                                                                                                                                                                                                                                                                                              | 27 |
| <b>Table S5.</b> Selected hydrogen bonds ( Å ) in $[\Delta,\Delta\text{-V}^{\text{IV}}_2\text{O}_2(\text{S,S-tart})(\text{Him})_6]\cdot 4\text{H}_2\text{O}$ ( <b>4</b> ).....                                                                                                                                                                                                                                                                                                                                                                                                                                                                                       | 28 |
| <b>Table S6.</b> Selected bond distances ( Å ) and angles ( ° ) for $(\text{H}_2\text{im})_2[\Delta,\Lambda\text{-V}^{\text{IV}}_2\text{O}_2(\text{R,R-H}_2\text{tart})(\text{R,R-tart})(\text{Him})_2]\cdot\text{Him}$ ( <b>1</b> ).....                                                                                                                                                                                                                                                                                                                                                                                                                            | 29 |
| <b>Table S7.</b> Selected bond distances ( Å ) and angles ( ° ) for $[\Lambda,\Lambda\text{-V}^{\text{IV}}_2\text{O}_2(\text{R,R-tart})(\text{Him})_6]\cdot 4\text{H}_2\text{O}$ ( <b>2</b> ).....                                                                                                                                                                                                                                                                                                                                                                                                                                                                   | 30 |
| <b>Table S8.</b> Selected bond distances ( Å ) and angles ( ° ) for $(\text{H}_2\text{im})_2[\Lambda,\Delta\text{-V}^{\text{IV}}_2\text{O}_2(\text{S,S-H}_2\text{tart})(\text{S,S-tart})(\text{Him})_2]\cdot\text{Him}$ ( <b>3</b> ).....                                                                                                                                                                                                                                                                                                                                                                                                                            | 31 |
| <b>Table S9.</b> Selected bond distances ( Å ) and angles ( ° ) for $[\Delta,\Delta\text{-V}^{\text{IV}}_2\text{O}_2(\text{S,S-tart})(\text{Him})_6]\cdot 4\text{H}_2\text{O}$ ( <b>4</b> ).....                                                                                                                                                                                                                                                                                                                                                                                                                                                                     | 32 |
| <b>Table S10a.</b> The formulas of oxidovanadium tartrates <b>1 – 18</b> , other oxidovanadium hydroxycarboxylates <b>19 – 38</b> and reported FeV-cos <b>39 – 43</b> .....                                                                                                                                                                                                                                                                                                                                                                                                                                                                                          | 33 |
| <b>Table S10b.</b> Comparisons of selected bond distances ( Å ) for oxidovanadium tartrates <b>1 – 18</b> , other oxidovanadium hydroxycarboxylates <b>19 – 38</b> and reported FeV-cos <b>39 – 43</b> .....                                                                                                                                                                                                                                                                                                                                                                                                                                                         | 34 |
| <b>Table S11.</b> Comparisons of Mo–O distances ( Å ) in typical molybdenum citrates with bridging sulfur/oxygen atom.....                                                                                                                                                                                                                                                                                                                                                                                                                                                                                                                                           | 36 |
| <b>Table S12.</b> Bond valence calculations for complexes $(\text{H}_2\text{im})_2[\Delta,\Lambda\text{-V}^{\text{IV}}_2\text{O}_2(\text{R,R-H}_2\text{tart})(\text{R,R-tart})(\text{Him})_2]\cdot\text{Him}$ ( <b>1</b> ), $[\Lambda,\Lambda\text{-V}^{\text{IV}}_2\text{O}_2(\text{R,R-tart})(\text{Him})_6]\cdot 4\text{H}_2\text{O}$ ( <b>2</b> ), $(\text{H}_2\text{im})_2[\Lambda,\Delta\text{-V}^{\text{IV}}_2\text{O}_2(\text{S,S-H}_2\text{tart})(\text{S,S-tart})(\text{Him})_2]\cdot\text{Him}$ ( <b>3</b> ) and $[\Delta,\Delta\text{-V}^{\text{IV}}_2\text{O}_2(\text{S,S-tart})(\text{Him})_6]\cdot 4\text{H}_2\text{O}$ ( <b>4</b> ), respectively. . | 37 |

**Figure S1.** 2D layered structure of  $(\text{H}_2\text{im})_2[\Delta,\Lambda\text{-V}^{\text{IV}}\text{O}_2(\text{R,R-H}_2\text{tart})(\text{R,R-tart})(\text{Him})_2] \cdot \text{Him}$  (**1**).

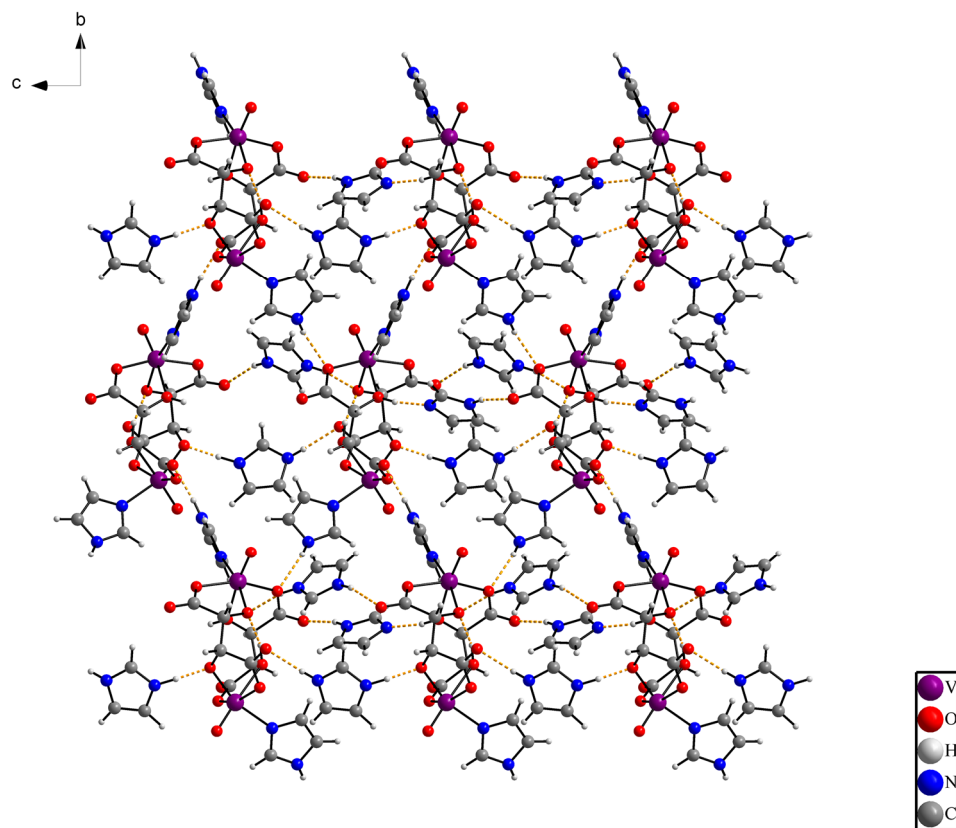



**Figure S2.** 2D layered structure of  $[\Lambda,\Lambda\text{-V}^{\text{IV}}_2\text{O}_2(\text{R,R-tart})(\text{Him})_6]\cdot 4\text{H}_2\text{O}$  (**2**).

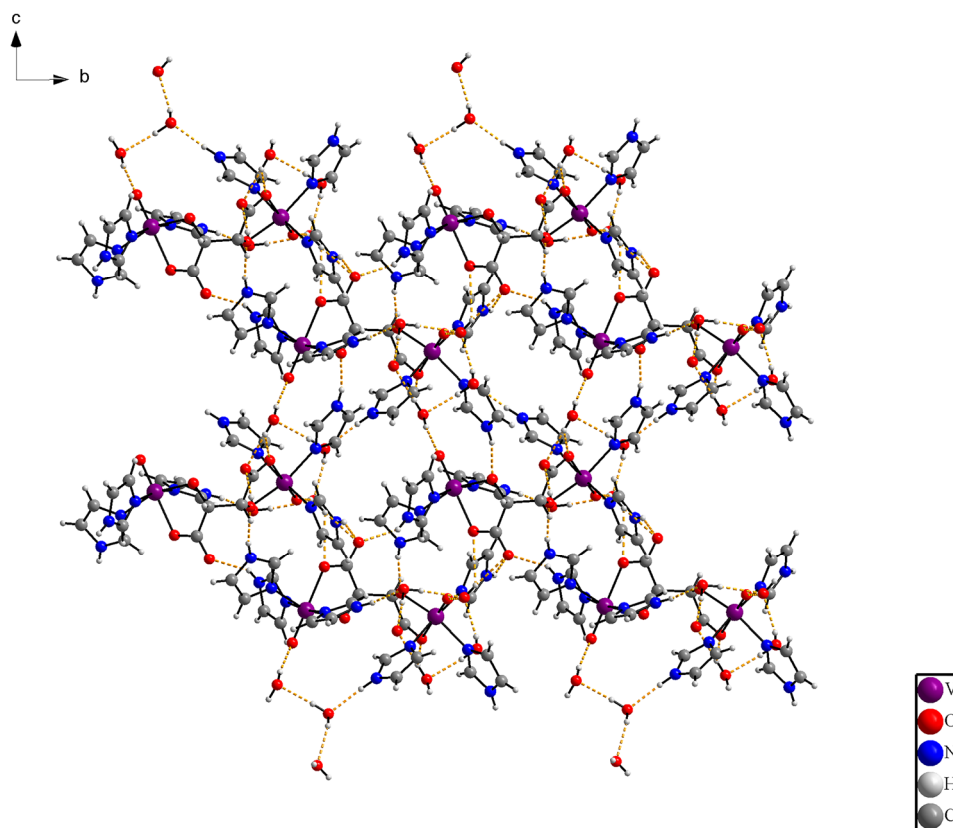

**Figure S3.** ORTEP plot of the anion structure  $(\text{H}_2\text{im})_2[\Lambda,\Delta\text{-V}^{\text{IV}}\text{O}_2(\text{S,S-H}_2\text{tart})(\text{S,S-tart})(\text{Him})_2] \cdot \text{Him}$  (**3**) at the 30% probability levels.

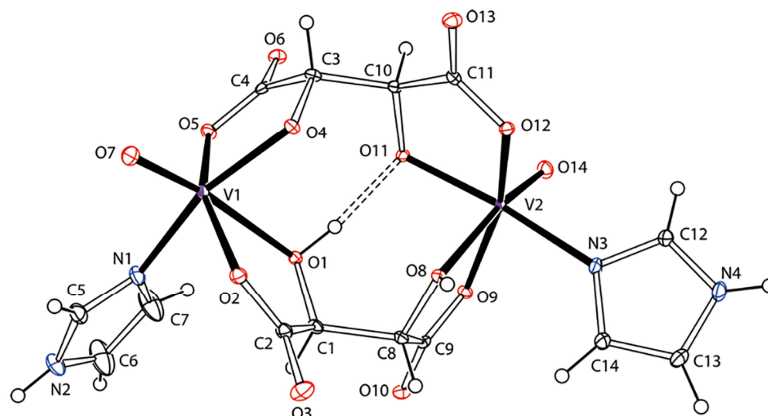

**Figure S4.** ORTEP plot of the molecular structure  $[\Delta,\Delta\text{-V}^{\text{IV}}_2\text{O}_2(\text{S,S-tart})(\text{Him})_6]\cdot 4\text{H}_2\text{O}$  (**4**) at the 30% probability levels.

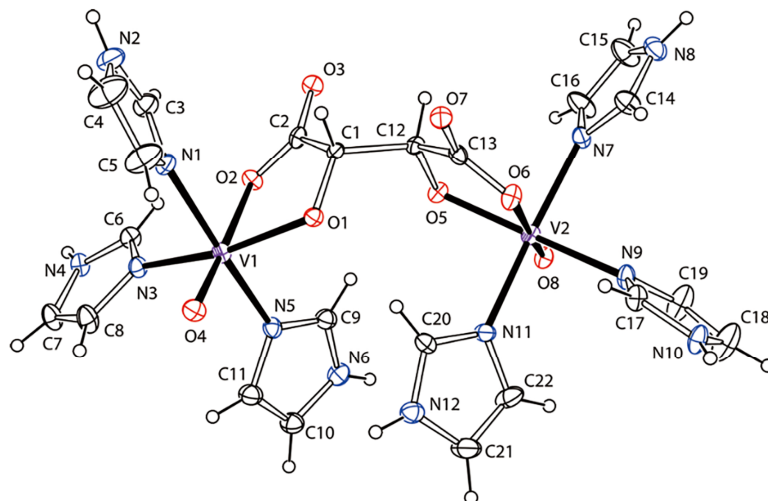

**Figure S5.** Chemdraw structures for oxidovanadium tartrates **5 – 8**, other oxidovanadium hydroxycarboxylates **9 – 16** and reported FeV-cos **17 – 21**.

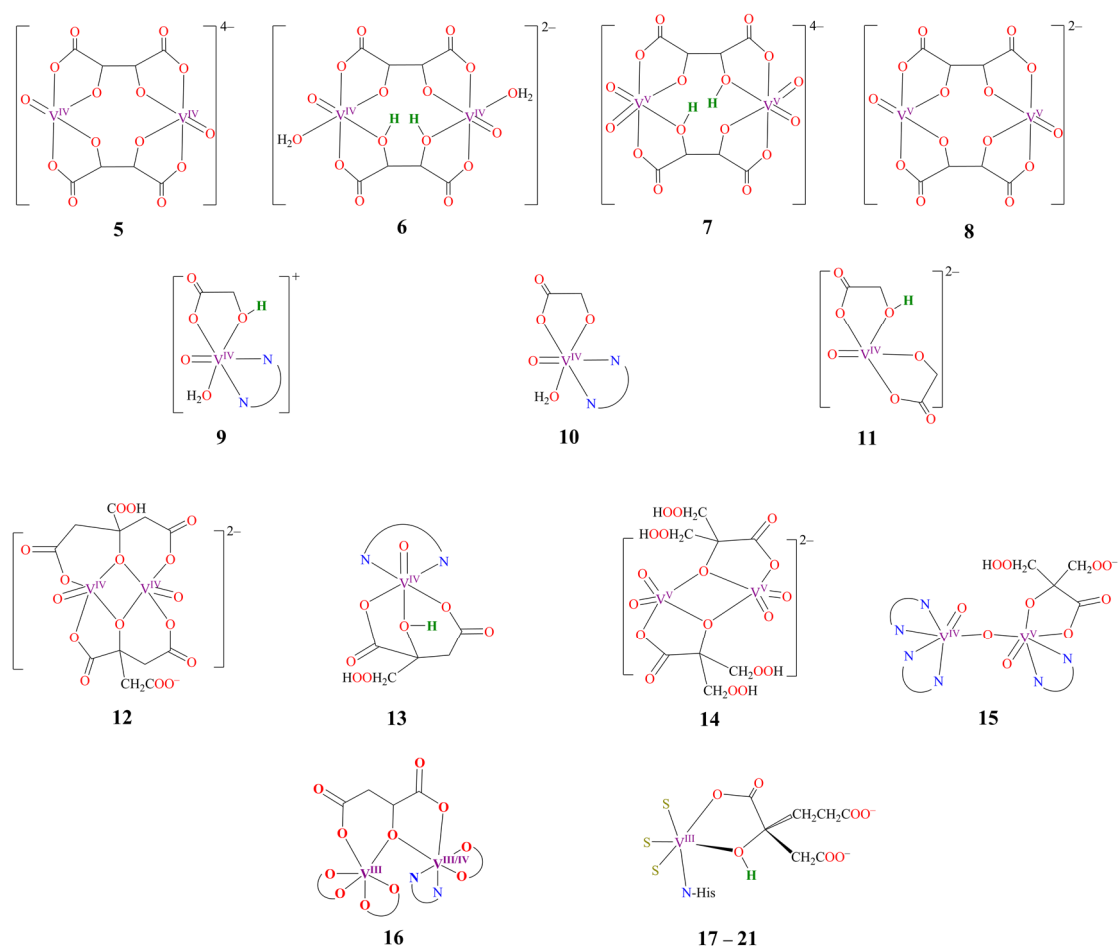

**Figure S6.** FT-IR spectrum of *R,R*-tartaric acid originated from Spectral Database for Organic Compounds SDBS. URL for this compound: <https://sdb.sdb.aist.go.jp/sdb/cgi-bin/landingpage?sdbno=1071>.

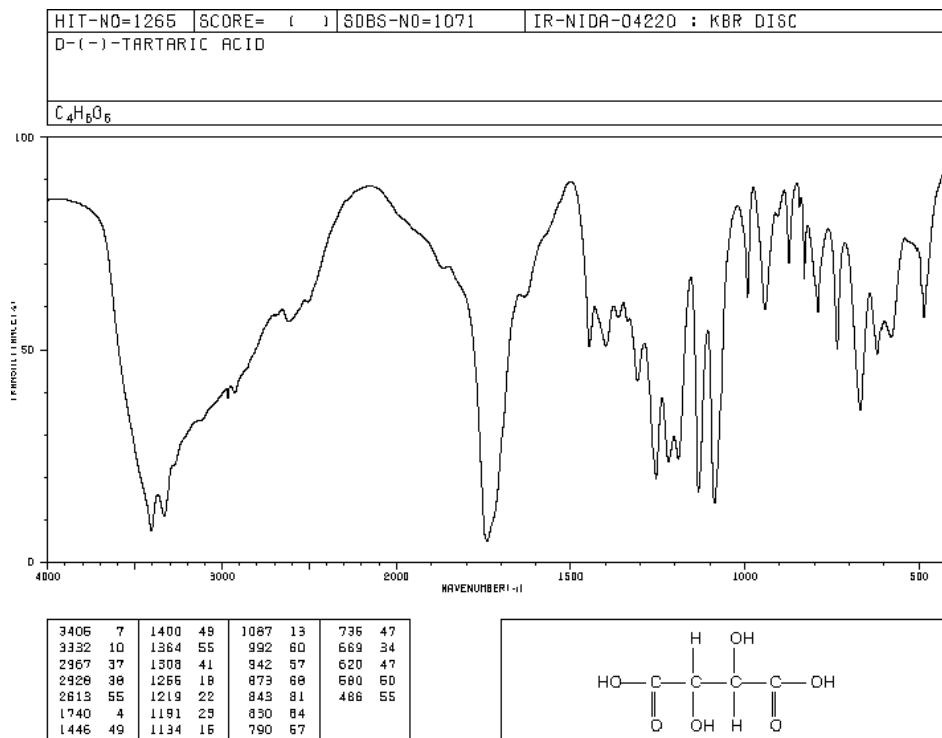

**Figure S7.** FT-IR spectrum of *S, S*-tartaric acid originated from Spectral Database for Organic Compounds SDBS. URL for this compound: <https://sdb.db.aist.go.jp/sdb/cgi-bin/landingpage?sdbno=488>.

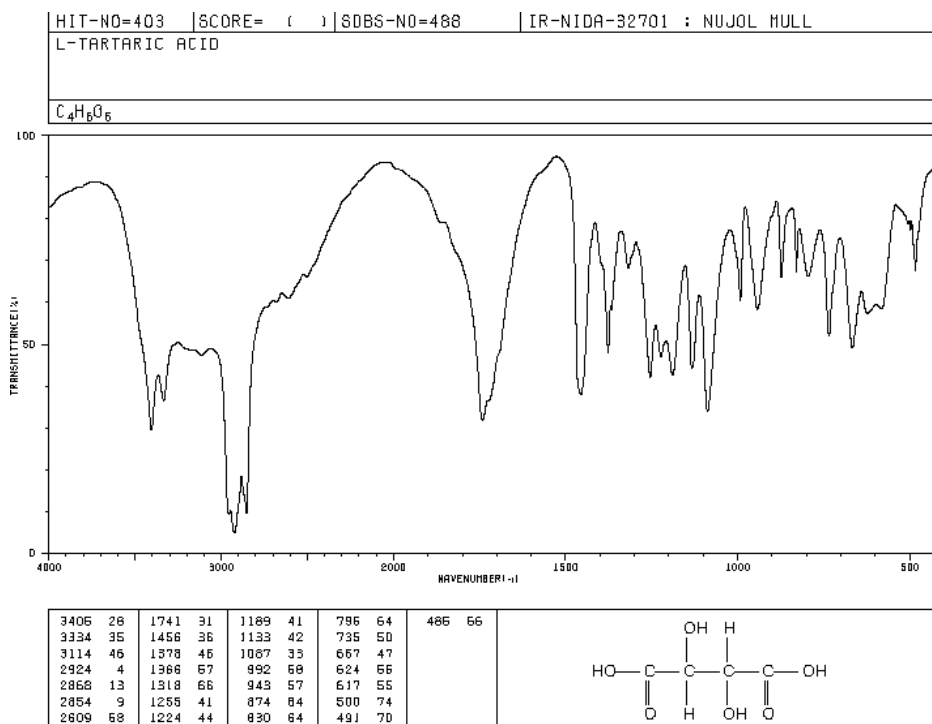

**Figure S8a.** VCD and IR spectra of  $(\text{H}_2\text{im})_2[\Delta,\Lambda\text{-V}^{\text{IV}}_2\text{O}_2(\text{R,R-H}_2\text{tart})(\text{R,R-tart})(\text{Him})_2]\cdot\text{Him}$  (**1**) with KBr pellet.

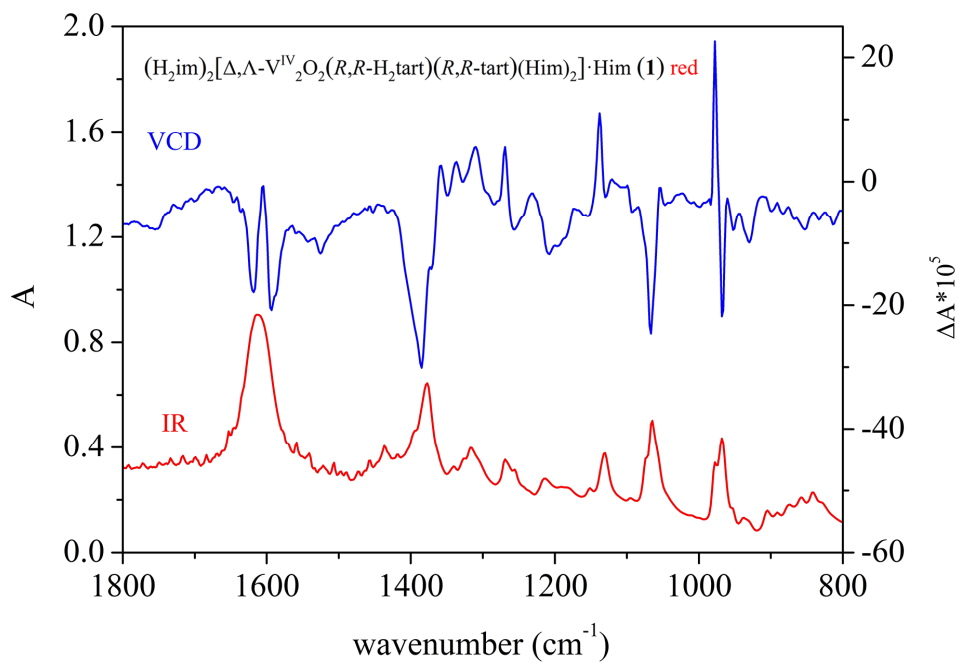

**Figure S8b.** VCD and IR spectra of  $[\Lambda,\Lambda\text{-V}^{\text{IV}}_2\text{O}_2(R,R\text{-tart(Him)}_6)]\cdot 4\text{H}_2\text{O}$  (**2**) with KBr pellet.

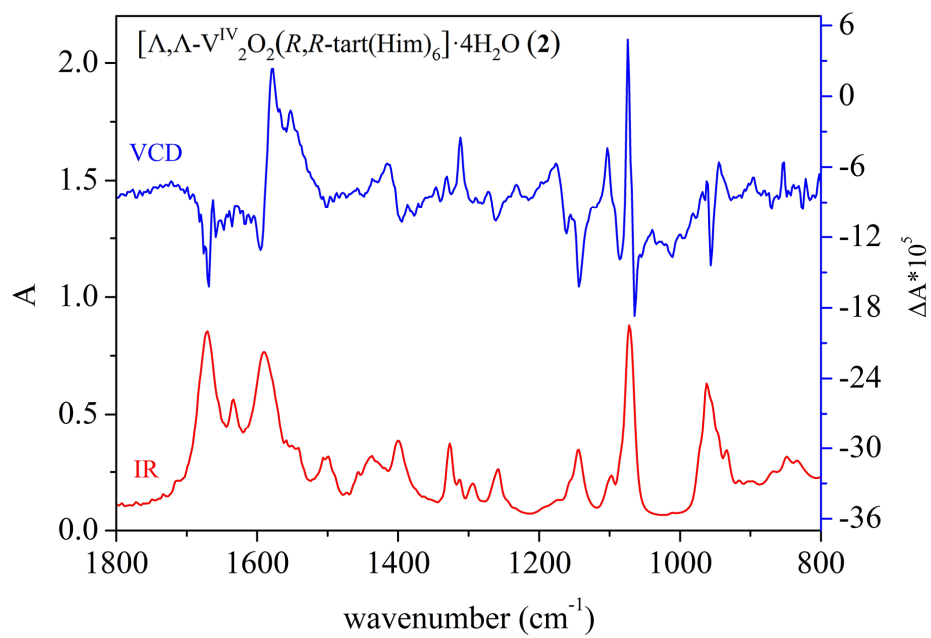



**Figure S8c.** VCD and IR spectra of  $(\text{H}_2\text{im})_2[\Lambda,\Delta\text{-V}^{\text{IV}}\text{O}_2(\text{S,S-H}_2\text{tart})(\text{S,S-tart})(\text{Him})_2]\cdot\text{Him}$  (**3**) with KBr pellet.

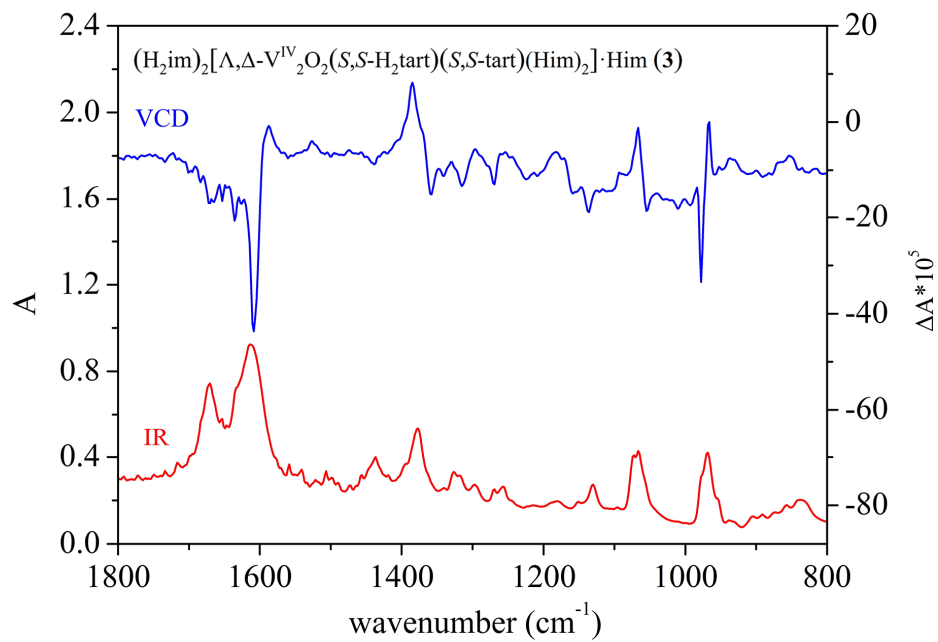

**Figure S8d.** VCD and IR spectra of  $[\Delta,\Delta\text{-V}^{\text{IV}}_2\text{O}_2(\text{S,S-tart}(\text{Him})_6)]\cdot 4\text{H}_2\text{O}$  (**4**) with KBr pellet.

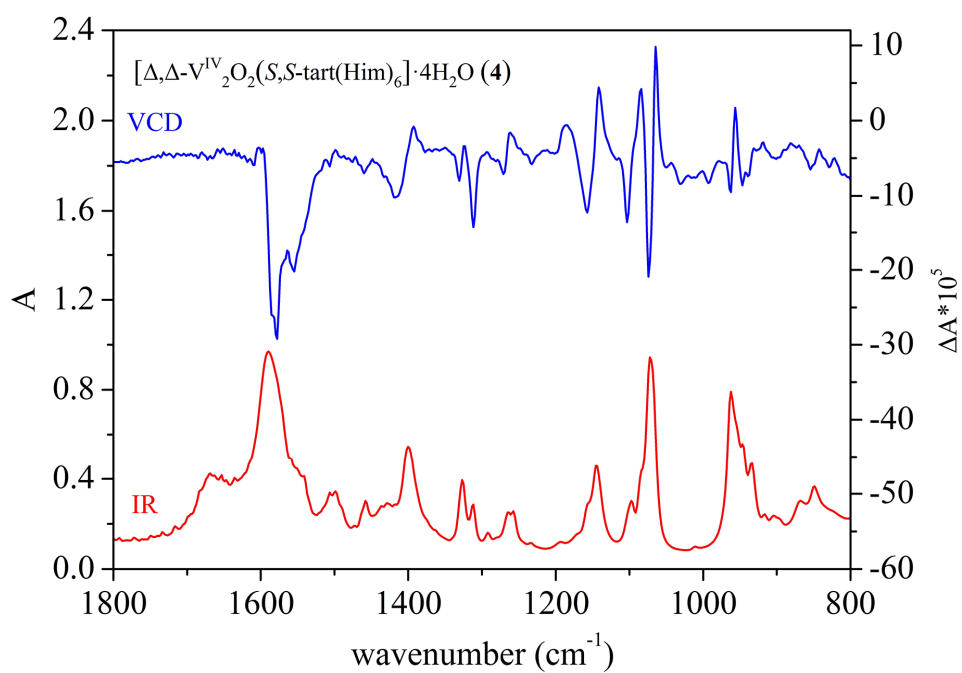

**Figure S9.** X-band EPR spectra of **1** and **3** in solid-states (a) and **1** in H<sub>2</sub>O (b) at 298 K, respectively.

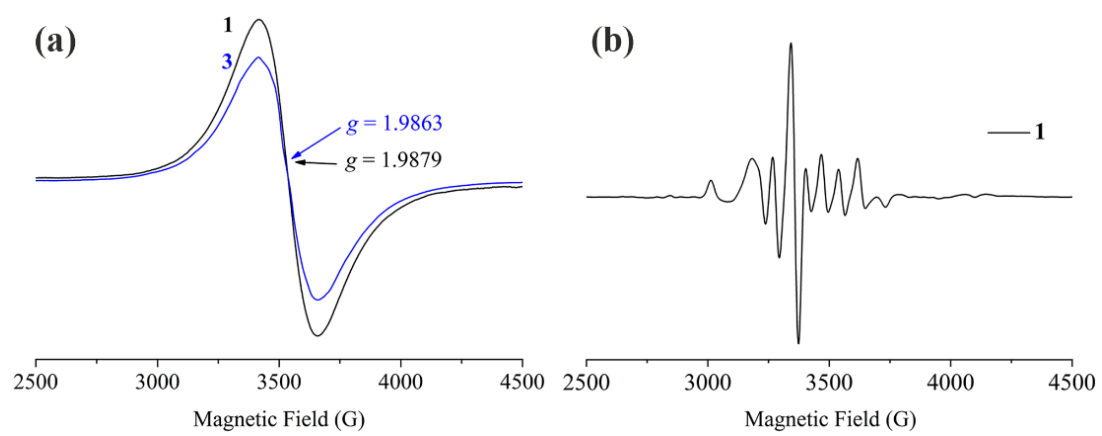

**Figure S10.** X-band EPR spectra with  $g$ -axis in solid state of **1** – **4** at 298 K, respectively.

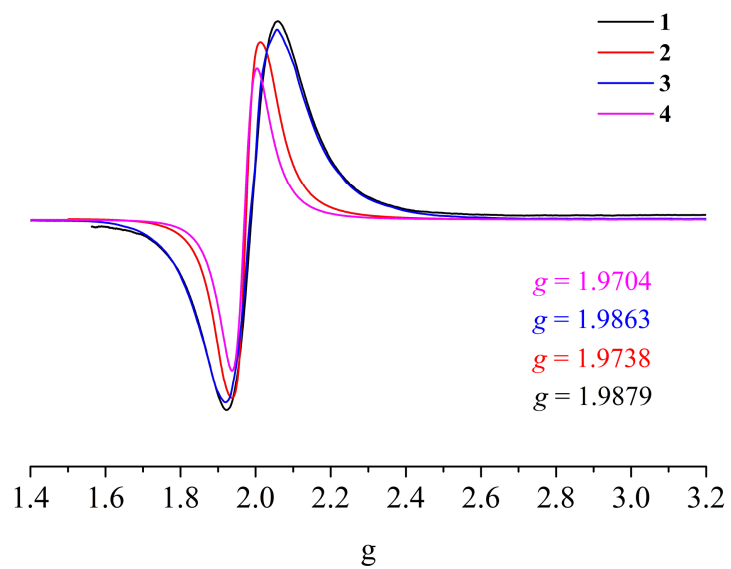

**Figure S11.** Temperature-dependence magnetic susceptibility of **2** in an applied field of  $B = 0.1$  T over the range of 2 – 300 K. Red line correspond to the best fitting result.

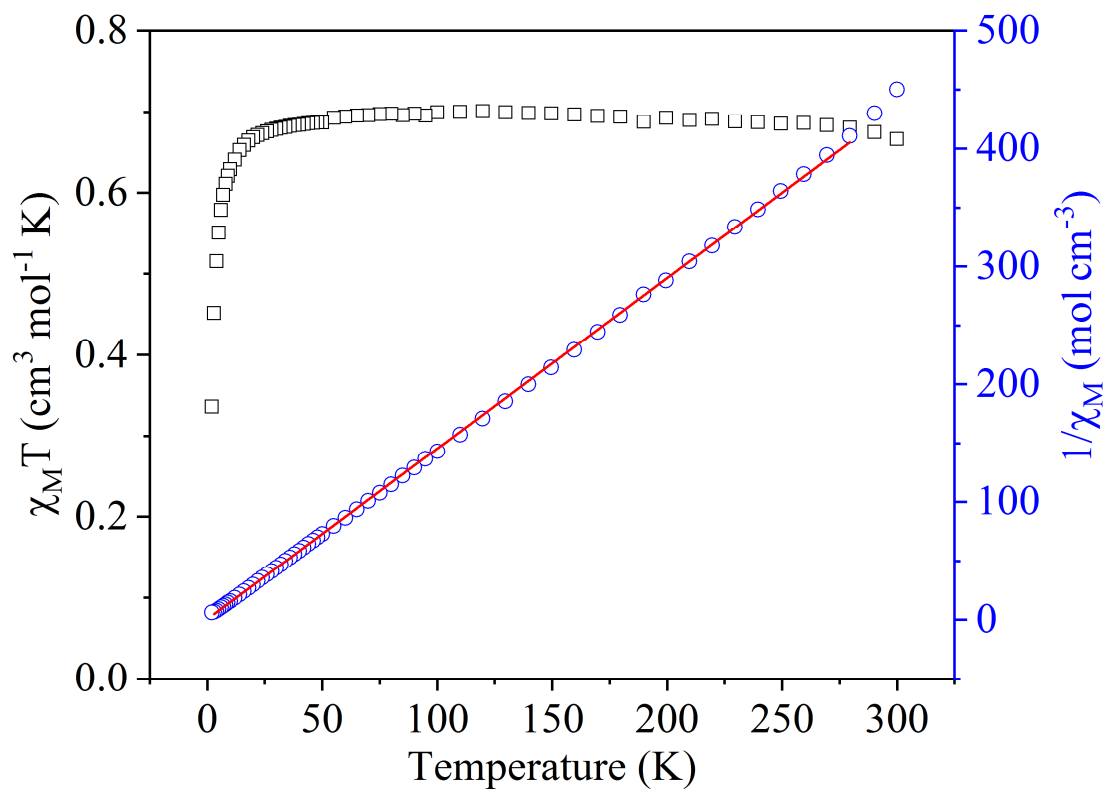

**Figure S12.** IR spectra of  $(\text{H}_2\text{im})_2[\Delta,\Delta\text{-V}^{\text{IV}}_2\text{O}_2(\text{R,R-H}_2\text{tart})(\text{R,R-tart})(\text{Him})_2]\cdot\text{Him}$  (**1**),  $[\Delta,\Delta\text{-V}^{\text{IV}}_2\text{O}_2(\text{R,R-tart})(\text{Him})_6]\cdot 4\text{H}_2\text{O}$  (**2**),  $(\text{H}_2\text{im})_2[\Delta,\Delta\text{-V}^{\text{IV}}_2\text{O}_2(\text{S,S-H}_2\text{tart})(\text{S,S-tart})(\text{Him})_2]\cdot\text{Him}$  (**3**) and  $[\Delta,\Delta\text{-V}^{\text{IV}}_2\text{O}_2(\text{S,S-tart})(\text{Him})_6]\cdot 4\text{H}_2\text{O}$  (**4**), respectively.

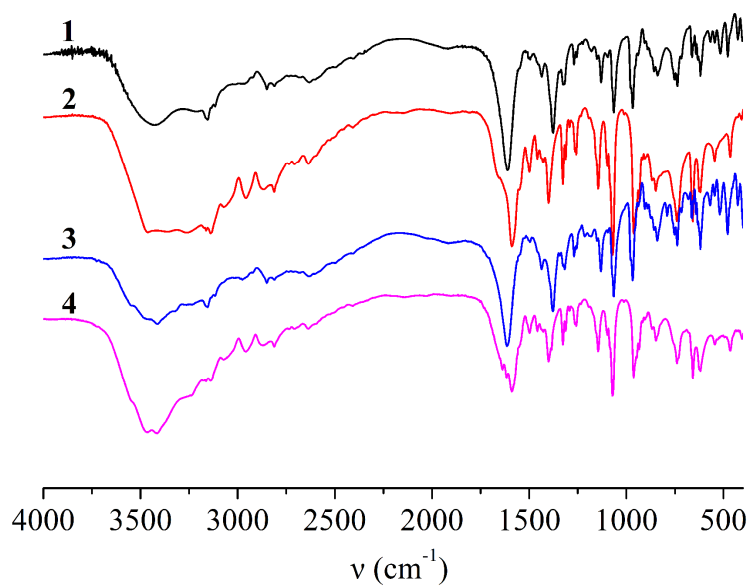

**Figure S13.** (a) Diffused reflectance UV-Vis spectra of solids  $(\text{H}_2\text{im})_2[\Delta,\Lambda\text{-V}^{\text{IV}}_2\text{O}_2(\text{R,R-H}_2\text{tart})(\text{R,R-tart})(\text{Him})_2]\cdot\text{Him}$  (**1**),  $[\Lambda,\Lambda\text{-V}^{\text{IV}}_2\text{O}_2(\text{R,R-tart})(\text{Him})_6]\cdot 4\text{H}_2\text{O}$  (**2**),  $(\text{H}_2\text{im})_2[\Lambda,\Delta\text{-V}^{\text{IV}}_2\text{O}_2(\text{S,S-H}_2\text{tart})(\text{S,S-tart})(\text{Him})_2]\cdot\text{Him}$  (**3**) and  $[\Delta,\Delta\text{-V}^{\text{IV}}_2\text{O}_2(\text{S,S-tart})(\text{Him})_6]\cdot 4\text{H}_2\text{O}$  (**4**), respectively. (b) Comparisons for solid and solution UV-Vis spectrum of  $[\Lambda,\Lambda\text{-V}^{\text{IV}}_2\text{O}_2(\text{R,R-tart})(\text{Him})_6]\cdot 4\text{H}_2\text{O}$  (**2**) in water (inset: UV-Vis spectra with local amplification regions).

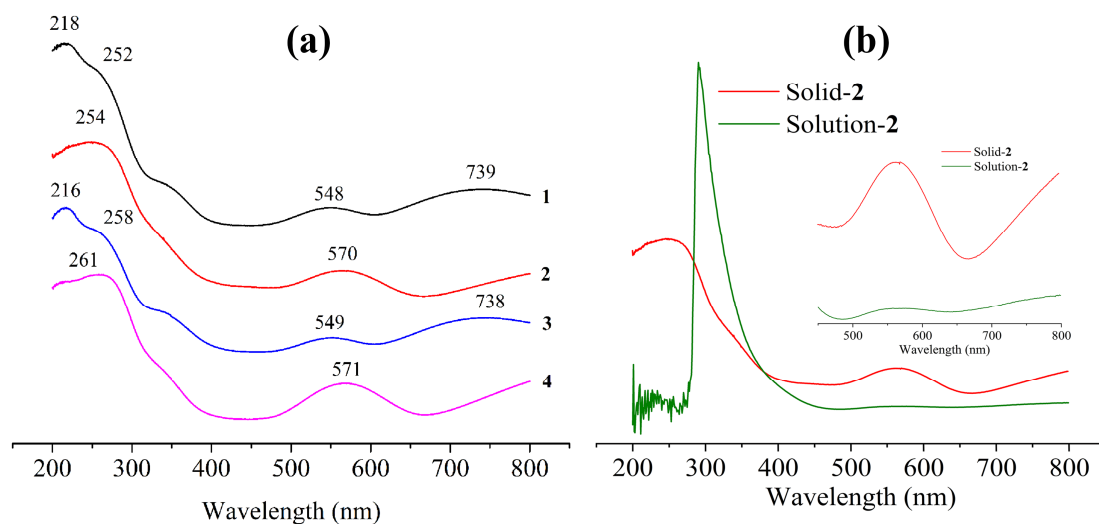

**Figure S14.** TG–DTG curves of  $(\text{H}_2\text{im})_2[\Delta,\Lambda\text{-V}^{\text{IV}}\text{O}_2(\text{R,R-H}_2\text{tart})(\text{R,R-tart})(\text{Him})_2]\cdot\text{Him}$  (**1**, a); TG–DTG curves of  $[\Lambda,\Lambda\text{-V}^{\text{IV}}\text{O}_2(\text{R,R-tart})(\text{Him})_6]\cdot 4\text{H}_2\text{O}$  (**2**, b); TG–DTG curves of  $(\text{H}_2\text{im})_2[\Lambda,\Delta\text{-V}^{\text{IV}}\text{O}_2(\text{S,S-H}_2\text{tart})(\text{S,S-tart})(\text{Him})_2]\cdot\text{Him}$  (**3**, c); TG–DTG curves of  $[\Delta,\Delta\text{-V}^{\text{IV}}\text{O}_2(\text{S,S-tart})(\text{Him})_6]\cdot 4\text{H}_2\text{O}$  (**4**, d).

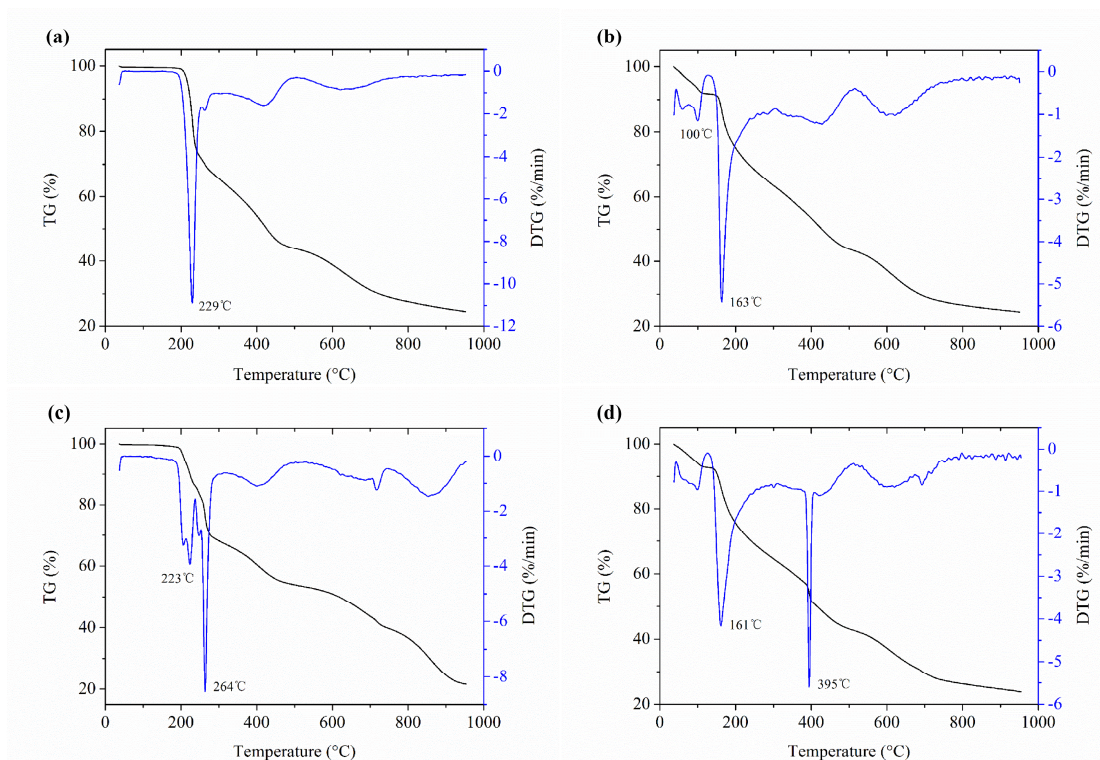



**Figure S15.** Cyclic voltammogram of  $[\Lambda,\Lambda\text{-V}_2\text{O}_2(R,R\text{-tart})(\text{Him})_6]\cdot 4\text{H}_2\text{O}$  (**2**) in anhydrous DMF with 0.10 M  $[\text{n-Bu}_4\text{N}]\text{ClO}_4$  at a glassy carbon electrode with scan rate of  $50\text{ mV}\cdot\text{s}^{-1}$  (a) and various scan rates (b), respectively. (c) Plots of redox peak currents against  $v^{1/2}$ . (d) Differential pulse voltammogram of **2**.

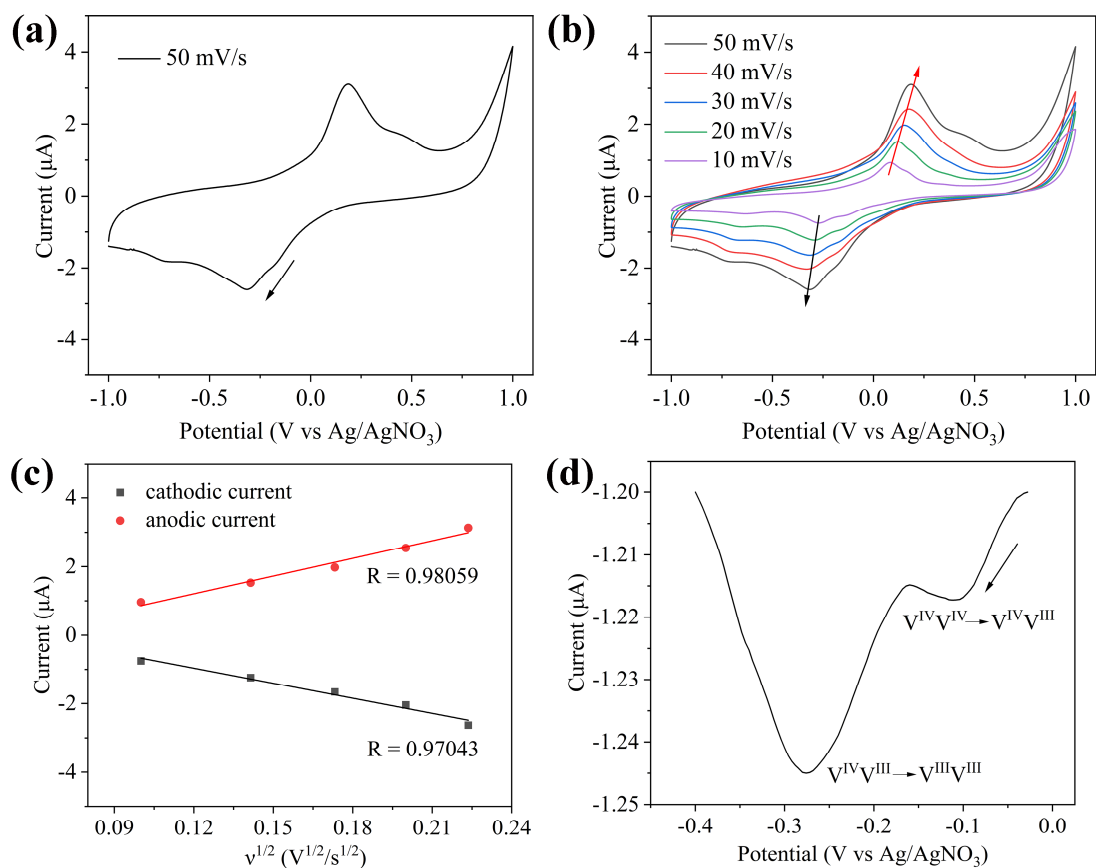

**Figure S16.** Comparison of the observed PXRD (red) with the simulated patterns (black) calculated from the crystal data for  $[\Lambda,\Lambda\text{-V}^{\text{IV}}_2\text{O}_2(\text{R,R-tart})(\text{Him})_6]\cdot 4\text{H}_2\text{O}$  (**2**).

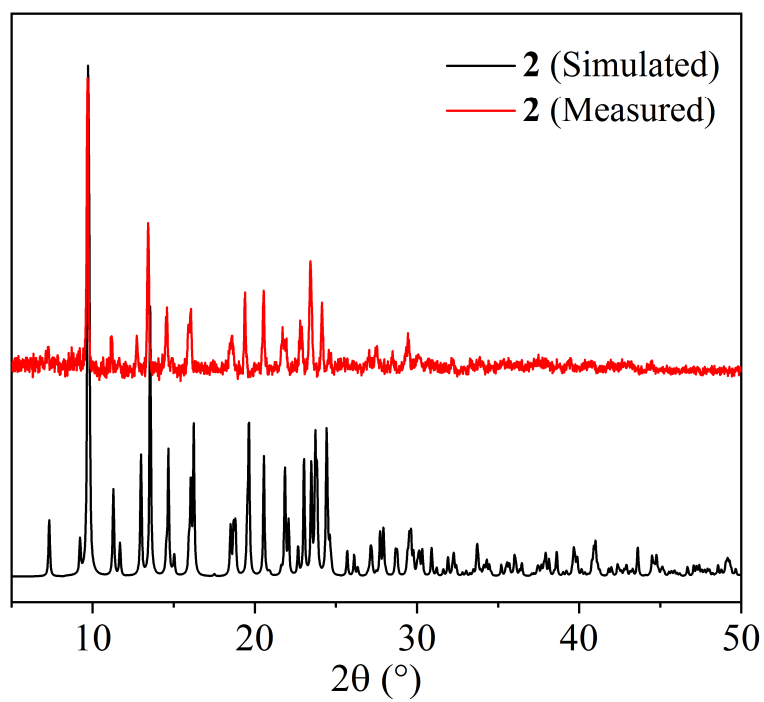

**Table S1.** Crystallographic data and structural refinements for complexes (H<sub>2</sub>im)<sub>2</sub>[ $\Delta,\Lambda$ -V<sup>IV</sup>O<sub>2</sub>(*R,R*-H<sub>2</sub>tart)(*R,R*-tart)(Him)<sub>2</sub>] $\cdot$ Him (**1**), [ $\Lambda,\Lambda$ -V<sup>IV</sup>O<sub>2</sub>(*R,R*-tart)(Him)<sub>6</sub>] $\cdot$ 4H<sub>2</sub>O (**2**), (H<sub>2</sub>im)<sub>2</sub>[ $\Lambda,\Delta$ -V<sup>IV</sup>O<sub>2</sub>(*S,S*-H<sub>2</sub>tart)(*S,S*-tart)(Him)<sub>2</sub>] $\cdot$ Him (**3**) and [ $\Delta,\Delta$ -V<sup>IV</sup>O<sub>2</sub>(*S,S*-tart)(Him)<sub>6</sub>] $\cdot$ 4H<sub>2</sub>O (**4**), respectively.

|                                       | <b>1</b>                                                                       | <b>2</b>                                                                       | <b>3</b>                                                                       | <b>4</b>                                                                       |
|---------------------------------------|--------------------------------------------------------------------------------|--------------------------------------------------------------------------------|--------------------------------------------------------------------------------|--------------------------------------------------------------------------------|
| Empirical formula                     | C <sub>23</sub> H <sub>28</sub> N <sub>10</sub> O <sub>14</sub> V <sub>2</sub> | C <sub>22</sub> H <sub>34</sub> N <sub>12</sub> O <sub>12</sub> V <sub>2</sub> | C <sub>23</sub> H <sub>28</sub> N <sub>10</sub> O <sub>14</sub> V <sub>2</sub> | C <sub>22</sub> H <sub>34</sub> N <sub>12</sub> O <sub>12</sub> V <sub>2</sub> |
| Formula weight                        | 770.43                                                                         | 760.49                                                                         | 770.43                                                                         | 760.49                                                                         |
| Temperature/K                         | 173(1)                                                                         | 100(1)                                                                         | 100(1)                                                                         | 100(1)                                                                         |
| Crystal system                        | monoclinic                                                                     | monoclinic                                                                     | monoclinic                                                                     | monoclinic                                                                     |
| Space group                           | <i>P</i> 2 <sub>1</sub>                                                        | <i>P</i> 2 <sub>1</sub>                                                        | <i>P</i> 2 <sub>1</sub>                                                        | <i>P</i> 2 <sub>1</sub>                                                        |
| <i>a</i> /Å                           | 8.9068(3)                                                                      | 10.1662(1)                                                                     | 8.8863(1)                                                                      | 10.1454(2)                                                                     |
| <i>b</i> /Å                           | 19.6606(6)                                                                     | 13.6125(1)                                                                     | 19.5997(1)                                                                     | 13.6326(2)                                                                     |
| <i>c</i> /Å                           | 9.8849(4)                                                                      | 12.8047(1)                                                                     | 9.8686(1)                                                                      | 12.7784(2)                                                                     |
| $\alpha$ /°                           | 90                                                                             | 90                                                                             | 90                                                                             | 90                                                                             |
| $\beta$ /°                            | 109.160(4)                                                                     | 109.405(1)                                                                     | 108.907(1)                                                                     | 109.196(2)                                                                     |
| $\gamma$ /°                           | 90                                                                             | 90                                                                             | 90                                                                             | 90                                                                             |
| Volume/Å <sup>3</sup>                 | 1635.1(1)                                                                      | 1671.35(3)                                                                     | 1626.07(3)                                                                     | 1669.09(5)                                                                     |
| <i>Z</i>                              | 2                                                                              | 2                                                                              | 2                                                                              | 2                                                                              |
| $\rho_{\text{calc}}$ /cm <sup>3</sup> | 1.565                                                                          | 1.511                                                                          | 1.574                                                                          | 1.513                                                                          |
| $\mu$ /mm <sup>-1</sup>               | 0.652                                                                          | 5.352                                                                          | 5.544                                                                          | 5.359                                                                          |
| <i>F</i> (000)                        | 788                                                                            | 784                                                                            | 788                                                                            | 784                                                                            |
| Crystal size/mm <sup>3</sup>          | 0.4 $\times$ 0.3 $\times$ 0.2                                                  | 0.1 $\times$ 0.1 $\times$ 0.1                                                  | 0.2 $\times$ 0.2 $\times$ 0.2                                                  | 0.2 $\times$ 0.15 $\times$ 0.15                                                |
| Radiation                             | MoK $\alpha$ ( $\lambda$ = 0.71073)                                            | CuK $\alpha$ ( $\lambda$ = 1.54184)                                            | CuK $\alpha$ ( $\lambda$ = 1.54184)                                            | CuK $\alpha$ ( $\lambda$ = 1.54184)                                            |

|                                                 |                                  |                                  |                                  |                                  |
|-------------------------------------------------|----------------------------------|----------------------------------|----------------------------------|----------------------------------|
| $2\theta$ range for data collection/ $^{\circ}$ | 4.362 to 49.98                   | 7.32 to 155.708                  | 9.474 to 155.064                 | 7.326 to 156.334                 |
| Reflections collected                           | 5991                             | 22233                            | 16285                            | 11514                            |
| Independent reflections                         | 4595                             | 6846                             | 4870                             | 5339                             |
| $R_{int}$                                       | 0.0298                           | 0.0301                           | 0.0249                           | 0.0318                           |
| Data/restraints/parameters                      | 4595/188/472                     | 6846/2/469                       | 4870/16/449                      | 5339/26/469                      |
| Goodness of fit on $F^2$                        | 1.043                            | 1.036                            | 1.083                            | 1.161                            |
| Final $R$ indexes [ $I \geq 2\sigma(I)$ ]       | $R_1 = 0.0377$ , $wR_2 = 0.0904$ | $R_1 = 0.0257$ , $wR_2 = 0.0662$ | $R_1 = 0.0266$ , $wR_2 = 0.0698$ | $R_1 = 0.0384$ , $wR_2 = 0.1091$ |
| Final $R$ indexes [all data]                    | $R_1 = 0.0405$ , $wR_2 = 0.0932$ | $R_1 = 0.0300$ , $wR_2 = 0.0695$ | $R_1 = 0.0289$ , $wR_2 = 0.0713$ | $R_1 = 0.0481$ , $wR_2 = 0.1233$ |
| Largest diff. peak/hole / $e \text{ \AA}^{-3}$  | 0.40/-0.36                       | 0.23/-0.39                       | 0.24/-0.53                       | 0.74/-0.74                       |
| Flack parameter                                 | 0.02(2)                          | -0.002(2)                        | 0.009(3)                         | 0.005(5)                         |

---

**Table S2.** Selected hydrogen bonds (Å) in (H<sub>2</sub>im)<sub>2</sub>[Δ,Λ-V<sup>IV</sup><sub>2</sub>O<sub>2</sub>(*R,R*-H<sub>2</sub>tart)(*R,R*-tart)(Him)<sub>2</sub>]·Him (**1**).

| Donor–H···Acceptor               | D–H(Å)  | H···A(Å) | D···A(Å) | D–H···A(°) |
|----------------------------------|---------|----------|----------|------------|
| O(4)–H(4)···N(9)                 | 0.86(3) | 1.69(2)  | 2.530(6) | 169(4)     |
| O(11)–H(11)···O(1)               | 0.88(2) | 1.92(2)  | 2.731(5) | 153(3)     |
| N(2)–H(2)···O(13) <sup>a</sup>   | 0.88    | 1.82     | 2.695(7) | 175        |
| N(4)–H(4A)···O(5) <sup>b</sup>   | 0.79(9) | 2.08(8)  | 2.836(7) | 160(8)     |
| N(5)–H(5A)···O(1)                | 0.88    | 1.89     | 2.755(5) | 167        |
| N(6)–H(6A)···O(2) <sup>c</sup>   | 0.88    | 2.54     | 3.093(5) | 121        |
| N(6)–H(6A)···O(3) <sup>c</sup>   | 0.88    | 2.02     | 2.876(6) | 163        |
| N(7)–H(7A)···O(8)                | 0.98(8) | 1.60(7)  | 2.573(6) | 175(9)     |
| N(8)–H(8A)···O(10) <sup>d</sup>  | 0.80(6) | 1.94(6)  | 2.723(6) | 167(6)     |
| N(10)–H(10A)···O(6) <sup>d</sup> | 0.88    | 1.95     | 2.811(6) | 166        |

Symmetric codes: (a)  $2 - x, \frac{1}{2} + y, 1 - z$ ; (b)  $2 - x, -\frac{1}{2} + y, 2 - z$ ; (c)  $x, y, 1 + z$ ; (d)  $x, y, -1 + z$ .

**Table S3.** Selected hydrogen bonds (Å) in  $[\Lambda, \Lambda\text{-V}^{\text{IV}}_2\text{O}_2(R,R\text{-tart})(\text{Him})_6] \cdot 4\text{H}_2\text{O}$  (**2**).

| Donor–H $\cdots$ Acceptor                | D–H(Å)  | H $\cdots$ A(Å) | D $\cdots$ A(Å) | D–H $\cdots$ A(°) |
|------------------------------------------|---------|-----------------|-----------------|-------------------|
| O(1w)–H(1wA) $\cdots$ O(7)               | 0.84(5) | 1.88(5)         | 2.719(3)        | 176(6)            |
| O(1w)–H(1wB) $\cdots$ O(2w) <sup>a</sup> | 0.84(7) | 2.05(7)         | 2.886(4)        | 174(5)            |
| O(2w)–H(2wA) $\cdots$ O(2) <sup>b</sup>  | 0.76(5) | 2.56(5)         | 3.104(3)        | 131(5)            |
| O(2w)–H(2wA) $\cdots$ O(3) <sup>b</sup>  | 0.76(5) | 2.14(5)         | 2.889(3)        | 172(5)            |
| O(2w)–H(2wB) $\cdots$ O(8) <sup>c</sup>  | 0.75(5) | 1.96(5)         | 2.697(4)        | 171(5)            |
| O(3w)–H(3wA) $\cdots$ O(2w)              | 0.82(6) | 2.01(6)         | 2.767(4)        | 153(6)            |
| O(3w)–H(3wB) $\cdots$ O(4w)              | 0.85(3) | 1.88(4)         | 2.703(4)        | 162(6)            |
| O(4w)–H(4wB) $\cdots$ O(4)               | 0.83(5) | 1.98(5)         | 2.803(3)        | 172(5)            |
| O(4w)–H(4wA) $\cdots$ O(7) <sup>d</sup>  | 0.87(5) | 1.88(5)         | 2.741(3)        | 170(5)            |
| N(2)–H(2) $\cdots$ O(3) <sup>e</sup>     | 0.86(5) | 2.10(4)         | 2.885(4)        | 151(4)            |
| N(4)–H(4) $\cdots$ O(5) <sup>f</sup>     | 0.86    | 1.93            | 2.778(3)        | 168               |
| N(6)–H(6) $\cdots$ O(1w) <sup>g</sup>    | 0.86    | 1.97            | 2.816(4)        | 169               |
| N(8)–H(8) $\cdots$ O(3) <sup>h</sup>     | 0.86    | 2.03            | 2.822(4)        | 153               |
| N(10)–H(10) $\cdots$ O(1)                | 0.86    | 1.92            | 2.756(3)        | 165               |
| N(12)–H(12) $\cdots$ O(3w)               | 0.86    | 1.86            | 2.722(4)        | 176               |

Symmetric codes: (a)  $1 - x, \frac{1}{2} + y, 1 - z$ ; (b)  $x, y, 1 + z$ ; (c)  $-x, -\frac{1}{2} + y, 1 - z$ ; (d)  $1 - x, -\frac{1}{2} + y, 1 - z$ ; (e)  $1 - x, -\frac{1}{2} + y, -z$ ; (f)  $-x, -\frac{1}{2} + y, -z$ ; (g)  $-1 + x, y, z$ ; (h)  $1 - x, \frac{1}{2} + y, -z$ .

**Table S4.** Selected hydrogen bonds (Å) in (H<sub>2</sub>im)<sub>2</sub>[Λ,Δ-V<sup>IV</sup>O<sub>2</sub>(S,S-H<sub>2</sub>tart)(S,S-tart)(Him)<sub>2</sub>]·Him (**3**).

| Donor–H⋯Acceptor                | D–H(Å)  | H⋯A(Å)  | D⋯A(Å)   | D–H⋯A(°) |
|---------------------------------|---------|---------|----------|----------|
| O(1)–H(1)⋯O(4)                  | 0.90(5) | 2.49(5) | 2.802(2) | 101(4)   |
| O(1)–H(1)⋯O(8)                  | 0.90(5) | 2.34(5) | 2.812(3) | 112(4)   |
| O(1)–H(1)⋯O(11)                 | 0.90(5) | 1.85(6) | 2.724(3) | 163(4)   |
| N(2)–H(2)⋯O(9) <sup>a</sup>     | 0.86    | 2.01    | 2.819(4) | 157      |
| N(4)–H(4)⋯O(3) <sup>b</sup>     | 0.86    | 1.83    | 2.686(4) | 174      |
| N(5)–H(5A)⋯O(4)                 | 0.86    | 1.75    | 2.565(3) | 158      |
| N(6)–H(6A)⋯O(6) <sup>c</sup>    | 0.86    | 1.9     | 2.720(3) | 158      |
| N(7)–H(7A)⋯O(11)                | 0.86    | 1.9     | 2.742(3) | 166      |
| O(8)–H(8)⋯N(9)                  | 0.87(2) | 1.65(2) | 2.509(3) | 171(3)   |
| N(8)–H(8B)⋯O(12) <sup>d</sup>   | 0.86    | 2.55    | 3.085(3) | 121      |
| N(8)–H(8B)⋯O(13) <sup>d</sup>   | 0.86    | 2.01    | 2.837(3) | 163      |
| N(10)–H(10A)⋯O(10) <sup>c</sup> | 0.86    | 1.96    | 2.796(3) | 166      |

Symmetric codes: (a)  $2 - x, \frac{1}{2} + y, 2 - z$ ; (b)  $2 - x, -\frac{1}{2} + y, 1 - z$ ; (c)  $x, y, -1 + z$ ; (d)  $x, y, 1 + z$ .

**Table S5.** Selected hydrogen bonds (Å) in  $[\Delta,\Delta\text{-V}^{\text{IV}}_2\text{O}_2(\text{S,S-tart})(\text{Him})_6]\cdot 4\text{H}_2\text{O}$  (**4**).

| Donor–H $\cdots$ Acceptor                | D–H(Å)  | H $\cdots$ A(Å) | D $\cdots$ A(Å) | D–H $\cdots$ A(°) |
|------------------------------------------|---------|-----------------|-----------------|-------------------|
| O(2w)–H(2wA) $\cdots$ O(3) <sup>a</sup>  | 0.81(7) | 1.91(7)         | 2.723(6)        | 175(7)            |
| N(2)–H(2) $\cdots$ O(3) <sup>b</sup>     | 0.86    | 2.02            | 2.817(8)        | 153               |
| O(1w)–H(1wA) $\cdots$ O(4)               | 0.85(1) | 1.85(1)         | 2.687(8)        | 172(9)            |
| O(2w)–H(2wB) $\cdots$ O(1w)              | 0.85(1) | 2.04(1)         | 2.877(10)       | 172(1)            |
| N(4)–H(4) $\cdots$ O(5) <sup>c</sup>     | 0.86    | 1.92            | 2.759(6)        | 163               |
| O(1w)–H(1wB) $\cdots$ O(7) <sup>d</sup>  | 0.68(1) | 2.22(1)         | 2.895(8)        | 170(1)            |
| O(4w)–H(4wA) $\cdots$ O(1w) <sup>e</sup> | 0.87(7) | 1.95(7)         | 2.759(9)        | 154(7)            |
| N(6)–H(6) $\cdots$ O(4w)                 | 0.86    | 1.85            | 2.709(9)        | 175               |
| O(4w)–H(4wB) $\cdots$ O(3w)              | 0.85(7) | 1.86(7)         | 2.694(9)        | 168(1)            |
| O(3w)–H(3wA) $\cdots$ O(3) <sup>f</sup>  | 0.80(1) | 1.95(1)         | 2.739(7)        | 168(7)            |
| N(8)–H(8) $\cdots$ O(7) <sup>g</sup>     | 0.86    | 2.12            | 2.878(8)        | 148               |
| O(3w)–H(3wB) $\cdots$ O(8)               | 0.86(7) | 1.95(7)         | 2.795(7)        | 171(7)            |
| N(10)–H(10) $\cdots$ O(1) <sup>h</sup>   | 0.76(1) | 2.03(1)         | 2.780(7)        | 172(1)            |
| N(12)–H(12) $\cdots$ O(2w)               | 0.86    | 1.96            | 2.809(9)        | 169               |

Symmetric codes: (a)  $1 + x, y, z$ ; (b)  $-x, -\frac{1}{2} + y, 2 - z$ ; (c)  $-x, -\frac{1}{2} + y, 1 - z$ ; (d)  $1 - x, -\frac{1}{2} + y, 2 - z$ ; (e)  $1 - x, \frac{1}{2} + y, 1 - z$ ; (f)  $-x, \frac{1}{2} + y, 1 - z$ ; (g)  $-x, \frac{1}{2} + y, 2 - z$ ; (h)  $1 - x, \frac{1}{2} + y, 2 - z$ .



**Table S6.** Selected bond distances (Å) and angles (°) for (H<sub>2</sub>im)<sub>2</sub>[Δ,Λ-V<sup>IV</sup>O<sub>2</sub>(*R,R*-H<sub>2</sub>tart)(*R,R*-tart)(Him)<sub>2</sub>] $\cdot$ Him (**1**).

| <b>1</b>       |          |                  |          |
|----------------|----------|------------------|----------|
| V(1)–O(1)      | 1.989(3) | V(2)–O(8)        | 1.961(3) |
| V(1)–O(2)      | 1.987(3) | V(2)–O(9)        | 1.990(4) |
| V(1)–O(4)      | 2.155(3) | V(2)–O(11)       | 2.318(3) |
| V(1)–O(5)      | 2.051(3) | V(2)–O(12)       | 2.007(3) |
| V(1)–O(7)      | 1.603(4) | V(2)–O(14)       | 1.595(4) |
| V(1)–N(1)      | 2.130(4) | V(2)–N(3)        | 2.126(4) |
| O(1)–V(1)–O(5) | 90.1(1)  | O(8)–V(2)–O(11)  | 81.5(1)  |
| O(1)–V(1)–O(4) | 84.9(1)  | O(8)–V(2)–O(9)   | 81.4(1)  |
| O(1)–V(1)–N(1) | 166.2(2) | O(8)–V(2)–O(12)  | 90.4(2)  |
| O(2)–V(1)–O(5) | 159.3(1) | O(8)–V(2)–N(3)   | 161.0(2) |
| O(2)–V(1)–O(4) | 85.6(1)  | O(9)–V(2)–O(11)  | 81.0(1)  |
| O(2)–V(1)–O(1) | 82.0(1)  | O(9)–V(2)–O(12)  | 155.6(2) |
| O(2)–V(1)–N(1) | 91.3(2)  | O(9)–V(2)–N(3)   | 91.7(2)  |
| O(5)–V(1)–O(4) | 74.7(1)  | O(12)–V(2)–O(11) | 75.0(1)  |
| O(5)–V(1)–N(1) | 92.1(2)  | O(12)–V(2)–N(3)  | 88.7(2)  |
| O(7)–V(1)–O(2) | 105.4(2) | O(14)–V(2)–O(11) | 171.5(2) |
| O(7)–V(1)–O(5) | 94.8(2)  | O(14)–V(2)–O(8)  | 103.9(2) |
| O(7)–V(1)–O(4) | 168.4(2) | O(14)–V(2)–O(9)  | 106.1(2) |
| O(7)–V(1)–O(1) | 100.2(2) | O(14)–V(2)–O(12) | 98.2(2)  |
| O(7)–V(1)–N(1) | 93.3(2)  | O(14)–V(2)–N(3)  | 95.0(2)  |
| N(1)–V(1)–O(4) | 82.5(2)  | N(3)–V(2)–O(11)  | 79.9(2)  |

**Table S7.** Selected bond distances (Å) and angles (°) for  $[\Lambda,\Lambda\text{-V}^{\text{IV}}_2\text{O}_2(R,R\text{-tart})(\text{Him})_6]\cdot 4\text{H}_2\text{O}$  (**2**).

| <b>2</b>       |           |                 |           |
|----------------|-----------|-----------------|-----------|
| V(1)–O(1)      | 1.975(2)  | V(2)–O(5)       | 1.976(2)  |
| V(1)–O(2)      | 2.159(2)  | V(2)–O(6)       | 2.112(2)  |
| V(1)–O(4)      | 1.608(2)  | V(2)–O(8)       | 1.618(2)  |
| V(1)–N(1)      | 2.143(2)  | V(2)–N(7)       | 2.122(2)  |
| V(1)–N(3)      | 2.111(2)  | V(2)–N(9)       | 2.102(2)  |
| V(1)–N(5)      | 2.118(3)  | V(2)–N(11)      | 2.103(2)  |
| O(1)–V(1)–O(2) | 77.61(8)  | O(5)–V(2)–O(6)  | 78.43(8)  |
| O(1)–V(1)–N(3) | 160.48(9) | O(5)–V(2)–N(9)  | 161.11(9) |
| O(1)–V(1)–N(1) | 92.24(9)  | O(5)–V(2)–N(11) | 92.22(9)  |
| O(1)–V(1)–N(5) | 90.52(9)  | O(5)–V(2)–N(7)  | 89.43(9)  |
| O(4)–V(1)–O(1) | 101.77(9) | O(6)–V(2)–N(7)  | 85.11(9)  |
| O(4)–V(1)–O(2) | 178.0(1)  | O(8)–V(2)–O(6)  | 177.9(1)  |
| O(4)–V(1)–N(3) | 97.5(1)   | O(8)–V(2)–O(5)  | 102.32(9) |
| O(4)–V(1)–N(1) | 92.6(1)   | O(8)–V(2)–N(9)  | 96.6(1)   |
| O(4)–V(1)–N(5) | 94.8(1)   | O(8)–V(2)–N(11) | 94.8(1)   |
| N(3)–V(1)–O(2) | 83.22(9)  | O(8)–V(2)–N(7)  | 93.0(1)   |
| N(3)–V(1)–N(1) | 89.9(1)   | N(9)–V(2)–O(6)  | 82.74(9)  |
| N(3)–V(1)–N(5) | 84.9(1)   | N(9)–V(2)–N(11) | 85.4(1)   |
| N(1)–V(1)–O(2) | 85.56(9)  | N(9)–V(2)–N(7)  | 90.4(1)   |
| N(5)–V(1)–O(2) | 87.15(9)  | N(11)–V(2)–O(6) | 87.12(9)  |
| N(5)–V(1)–N(1) | 171.47(9) | N(11)–V(2)–N(7) | 171.6(1)  |

**Table S8.** Selected bond distances (Å) and angles (°) for (H<sub>2</sub>im)<sub>2</sub>[Λ,Δ-V<sup>IV</sup><sub>2</sub>O<sub>2</sub>(S,S-H<sub>2</sub>tart)(S,S-tart)(Him)<sub>2</sub>]·Him (**3**).

| <b>3</b>       |           |                  |           |
|----------------|-----------|------------------|-----------|
| V(1)–O(1)      | 2.314(2)  | V(2)–O(8)        | 1.991(2)  |
| V(1)–O(2)      | 2.011(2)  | V(2)–O(9)        | 2.056(2)  |
| V(1)–O(4)      | 1.964(2)  | V(2)–O(11)       | 2.146(2)  |
| V(1)–O(5)      | 1.994(2)  | V(2)–O(12)       | 1.995(2)  |
| V(1)–O(7)      | 1.603(2)  | V(2)–O(14)       | 1.605(2)  |
| V(1)–N(1)      | 2.118(2)  | V(2)–N(3)        | 2.129(2)  |
| O(2)–V(1)–O(1) | 75.12(7)  | O(9)–V(2)–O(8)   | 75.21(7)  |
| O(2)–V(1)–N(1) | 88.53(9)  | O(9)–V(2)–N(3)   | 92.42(8)  |
| O(4)–V(1)–O(1) | 81.39(7)  | O(11)–V(2)–O(9)  | 90.11(7)  |
| O(4)–V(1)–O(5) | 81.26(8)  | O(11)–V(2)–O(8)  | 85.02(7)  |
| O(4)–V(1)–O(2) | 90.30(8)  | O(11)–V(2)–N(3)  | 165.89(9) |
| O(4)–V(1)–N(1) | 160.38(9) | O(12)–V(2)–O(9)  | 159.71(8) |
| O(5)–V(1)–O(1) | 80.85(7)  | O(12)–V(2)–O(8)  | 85.51(7)  |
| O(5)–V(1)–O(2) | 155.48(8) | O(12)–V(2)–O(11) | 81.88(7)  |
| O(5)–V(1)–N(1) | 91.83(9)  | O(12)–V(2)–N(3)  | 91.13(8)  |
| O(7)–V(1)–O(1) | 171.50(9) | O(14)–V(2)–O(12) | 105.32(9) |
| O(7)–V(1)–O(4) | 104.04(9) | O(14)–V(2)–O(9)  | 94.38(9)  |
| O(7)–V(1)–O(5) | 106.3(1)  | O(14)–V(2)–O(8)  | 168.53(9) |
| O(7)–V(1)–O(2) | 98.1(1)   | O(14)–V(2)–O(11) | 100.02(9) |
| O(7)–V(1)–N(1) | 95.5(1)   | O(14)–V(2)–N(3)  | 93.6(1)   |
| N(1)–V(1)–O(1) | 79.39(9)  | N(3)–V(2)–O(8)   | 82.21(9)  |

**Table S9.** Selected bond distances (Å) and angles (°) for [ $\Delta,\Delta$ -V<sup>IV</sup><sub>2</sub>O<sub>2</sub>(*S,S*-tart)(Him)<sub>6</sub>] $\cdot$ 4H<sub>2</sub>O (**4**).

| <b>4</b>       |          |                 |           |
|----------------|----------|-----------------|-----------|
| V(1)–O(1)      | 1.977(4) | V(2)–O(5)       | 1.966(4)  |
| V(1)–O(2)      | 2.114(4) | V(2)–O(6)       | 2.160(4)  |
| V(1)–O(4)      | 1.615(4) | V(2)–O(8)       | 1.596(4)  |
| V(1)–N(1)      | 2.127(5) | V(2)–N(7)       | 2.148(5)  |
| V(1)–N(3)      | 2.091(5) | V(2)–N(9)       | 2.125(5)  |
| V(1)–N(5)      | 2.105(5) | V(2)–N(11)      | 2.126(5)  |
|                |          |                 |           |
| O(1)–V(1)–O(2) | 78.3(2)  | O(5)–V(2)–O(6)  | 77.6(2)   |
| O(1)–V(1)–N(3) | 161.2(2) | O(5)–V(2)–N(7)  | 92.2(2)   |
| O(1)–V(1)–N(5) | 92.4(2)  | O(5)–V(2)–N(9)  | 160.7(2)  |
| O(1)–V(1)–N(1) | 89.6(2)  | O(5)–V(2)–N(11) | 90.6(2)   |
| O(2)–V(1)–N(1) | 85.3(2)  | O(8)–V(2)–O(5)  | 101.56(2) |
| O(4)–V(1)–O(2) | 178.1(2) | O(8)–V(2)–O(6)  | 178.0(2)  |
| O(4)–V(1)–O(1) | 102.3(2) | O(8)–V(2)–N(7)  | 92.7(2)   |
| O(4)–V(1)–N(3) | 96.4(2)  | O(8)–V(2)–N(9)  | 97.5(2)   |
| O(4)–V(1)–N(5) | 95.0(2)  | O(8)–V(2)–N(11) | 94.5(2)   |
| O(4)–V(1)–N(1) | 92.9(2)  | N(7)–V(2)–O(6)  | 85.6(2)   |
| N(3)–V(1)–O(2) | 82.9(2)  | N(9)–V(2)–O(6)  | 83.4(2)   |
| N(3)–V(1)–N(5) | 85.5(2)  | N(9)–V(2)–N(7)  | 90.0(2)   |
| N(3)–V(1)–N(1) | 89.9(2)  | N(9)–V(2)–N(11) | 84.7(2)   |
| N(5)–V(1)–O(2) | 86.8(2)  | N(11)–V(2)–O(6) | 87.3(2)   |
| N(5)–V(1)–N(1) | 171.3(2) | N(11)–V(2)–N(7) | 171.6(2)  |

**Table S10a.** The formulas of oxidovanadium tartrates **1** – **18**, other oxidovanadium hydroxycarboxylates **19** – **38** and reported FeV-cos **39** – **43**.

| Complexes (V <sup>n+</sup> ) | Formulas                                                                                                                                                          |
|------------------------------|-------------------------------------------------------------------------------------------------------------------------------------------------------------------|
| <b>1</b> (+4)                | (H <sub>2</sub> im) <sub>2</sub> [Δ,Λ-V <sup>IV</sup> <sub>2</sub> O <sub>2</sub> ( <i>R,R</i> -H <sub>2</sub> tart)( <i>R,R</i> -tart)(Him) <sub>2</sub> ]·Him   |
| <b>2</b> (+4)                | [Λ,Λ-V <sup>IV</sup> <sub>2</sub> O <sub>2</sub> ( <i>R,R</i> -tart)(Him) <sub>6</sub> ]·4H <sub>2</sub> O                                                        |
| <b>3</b> (+4)                | (H <sub>2</sub> im) <sub>2</sub> [Λ,Δ-V <sup>IV</sup> <sub>2</sub> O <sub>2</sub> ( <i>S,S</i> -H <sub>2</sub> tart)( <i>S,S</i> -tart)(Him) <sub>2</sub> ]·Him   |
| <b>4</b> (+4)                | [Δ,Δ-V <sup>IV</sup> <sub>2</sub> O <sub>2</sub> ( <i>S,S</i> -tart)(Him) <sub>6</sub> ]·4H <sub>2</sub> O                                                        |
| <b>5</b> <sup>1</sup> (+4)   | (NH <sub>4</sub> ) <sub>4</sub> [V <sub>2</sub> O <sub>2</sub> (tart) <sub>2</sub> ]·2H <sub>2</sub> O                                                            |
| <b>6</b> <sup>2</sup> (+4)   | Na <sub>4</sub> [V <sub>2</sub> O <sub>2</sub> (tart) <sub>2</sub> ]·12H <sub>2</sub> O                                                                           |
| <b>7</b> <sup>3</sup> (+4)   | Rb <sub>4</sub> [V <sub>2</sub> O <sub>2</sub> (tart) <sub>2</sub> ]·2H <sub>2</sub> O                                                                            |
| <b>8</b> <sup>3</sup> (+4)   | Cs <sub>4</sub> [V <sub>2</sub> O <sub>2</sub> (tart) <sub>2</sub> ]·2H <sub>2</sub> O                                                                            |
| <b>9</b> <sup>4</sup> (+4)   | Ca <sub>2</sub> [V <sub>2</sub> O <sub>2</sub> (tart) <sub>2</sub> ]·8H <sub>2</sub> O                                                                            |
| <b>10</b> <sup>5</sup> (+4)  | (NEt <sub>4</sub> ) <sub>4</sub> [V <sub>2</sub> O <sub>2</sub> (tart) <sub>2</sub> ]·8H <sub>2</sub> O                                                           |
| <b>11</b> <sup>6</sup> (+4)  | Cs <sub>2</sub> [V <sub>2</sub> O <sub>2</sub> (H <sub>2</sub> tart)(tart)(H <sub>2</sub> O) <sub>2</sub> ]·2H <sub>2</sub> O                                     |
| <b>12</b> <sup>6</sup> (+4)  | Rb <sub>2</sub> [V <sub>2</sub> O <sub>2</sub> (H <sub>2</sub> tart)(tart)(H <sub>2</sub> O) <sub>2</sub> ]·2H <sub>2</sub> O                                     |
| <b>13</b> <sup>6</sup> (+4)  | K <sub>2</sub> [(VO) <sub>2</sub> (tart) <sub>2</sub> (H <sub>2</sub> O) <sub>2</sub> ]·2H <sub>2</sub> O                                                         |
| <b>14</b> <sup>6</sup> (+4)  | [Na <sub>2</sub> (H <sub>2</sub> O) <sub>5</sub> V <sub>2</sub> O <sub>2</sub> (H <sub>2</sub> tart)(tart)]·2H <sub>2</sub> O                                     |
| <b>15</b> <sup>7</sup> (+4)  | [VO(O <sub>2</sub> )(bpz*eaT)·VO(H <sub>2</sub> tart)]·H <sub>2</sub> O                                                                                           |
| <b>16</b> <sup>8</sup> (+5)  | (NMe <sub>4</sub> ) <sub>2</sub> [V <sub>2</sub> O <sub>4</sub> ( <i>R,R</i> -H <sub>2</sub> tart) <sub>2</sub> ]·6H <sub>2</sub> O                               |
| <b>17</b> <sup>8</sup> (+5)  | (NMe <sub>4</sub> ) <sub>2</sub> [V <sub>2</sub> O <sub>2</sub> ( <i>R,R</i> -tart)( <i>S,S</i> -tart)]                                                           |
| <b>18</b> <sup>8</sup> (+5)  | (NEt <sub>4</sub> ) <sub>2</sub> [V <sub>2</sub> O <sub>2</sub> ( <i>R,R</i> -tart)( <i>S,S</i> -tart)]                                                           |
| <b>19</b> <sup>9</sup> (+4)  | [VO(Hglyc)(phen)(H <sub>2</sub> O)]Cl·2H <sub>2</sub> O                                                                                                           |
| <b>20</b> <sup>9</sup> (+4)  | [VO(glyc)(bpy)(H <sub>2</sub> O)]                                                                                                                                 |
| <b>21</b> <sup>9</sup> (+4)  | (NH <sub>4</sub> ) <sub>2</sub> [VO(glyc)(Hglyc) <sub>2</sub> ]·H <sub>2</sub> O                                                                                  |
| <b>22</b> <sup>10</sup> (+4) | K <sub>3</sub> [V <sub>2</sub> O <sub>2</sub> (Hcit)(cit)]·7H <sub>2</sub> O                                                                                      |
| <b>23</b> <sup>10</sup> (+4) | Na <sub>4</sub> [V <sub>2</sub> O <sub>2</sub> (cit) <sub>2</sub> ]·12H <sub>2</sub> O                                                                            |
| <b>24</b> <sup>10</sup> (+4) | (NH <sub>4</sub> ) <sub>4</sub> [V <sub>2</sub> O <sub>2</sub> (cit) <sub>2</sub> ]·2H <sub>2</sub> O                                                             |
| <b>25</b> <sup>11</sup> (+4) | [VO(H <sub>2</sub> cit)(bpy)]·2H <sub>2</sub> O                                                                                                                   |
| <b>26</b> <sup>11</sup> (+4) | [VO(H <sub>2</sub> cit)(phen)]·1.5H <sub>2</sub> O                                                                                                                |
| <b>27</b> <sup>11</sup> (+4) | [VO(H <sub>2</sub> cit)(phen)] <sub>2</sub> ·6.5H <sub>2</sub> O                                                                                                  |
| <b>28</b> <sup>12</sup> (+4) | [VO(H <sub>2</sub> cit)(bpy)]·1.5H <sub>2</sub> O                                                                                                                 |
| <b>29</b> <sup>13</sup> (+5) | Na <sub>2</sub> [V <sub>2</sub> O <sub>4</sub> (H <sub>2</sub> cit) <sub>2</sub> ]·2H <sub>2</sub> O                                                              |
| <b>30</b> <sup>14</sup> (+5) | (NH <sub>4</sub> ) <sub>4</sub> [V <sub>2</sub> O <sub>4</sub> (Hcit) <sub>2</sub> ]·4H <sub>2</sub> O                                                            |
| <b>31</b> <sup>14</sup> (+5) | (NH <sub>4</sub> ) <sub>6</sub> [V <sub>2</sub> O <sub>4</sub> (cit) <sub>2</sub> ]·6H <sub>2</sub> O                                                             |
| <b>32</b> <sup>15</sup> (+5) | [V <sub>2</sub> O <sub>3</sub> (phen) <sub>3</sub> (Hcit)]·5H <sub>2</sub> O                                                                                      |
| <b>33</b> <sup>15</sup> (+5) | [V <sub>2</sub> O <sub>3</sub> (phen) <sub>3</sub> (Hcit) <sub>2</sub> (phen) <sub>3</sub> O <sub>3</sub> V <sub>2</sub> ]·12H <sub>2</sub> O                     |
| <b>34</b> <sup>15</sup> (+5) | [V <sub>2</sub> O <sub>3</sub> (phen) <sub>3</sub> ( <i>R,S</i> -H <sub>2</sub> homocit)]Cl·6H <sub>2</sub> O                                                     |
| <b>35</b> <sup>16</sup> (+5) | K <sub>2</sub> [V <sub>2</sub> O <sub>4</sub> ( <i>R,S</i> -H <sub>2</sub> homocit) <sub>2</sub> ]·6H <sub>2</sub> O                                              |
| <b>36</b> <sup>16</sup> (+3) | [Δ-V <sup>III</sup> <sub>4</sub> V <sup>IV</sup> <sub>4</sub> O <sub>5</sub> ( <i>R</i> -mal) <sub>6</sub> (Hdatrz) <sub>6</sub> ]·44.5H <sub>2</sub> O           |
| <b>37</b> <sup>16</sup> (+3) | [Λ-V <sup>III</sup> <sub>4</sub> V <sup>IV</sup> <sub>4</sub> O <sub>5</sub> ( <i>S</i> -mal) <sub>6</sub> (Hdatrz) <sub>6</sub> ]·38.5H <sub>2</sub> O           |
| <b>38</b> (+3)               | K <sub>7</sub> [V <sup>III</sup> <sub>5</sub> V <sup>IV</sup> <sub>3</sub> O <sub>5</sub> ( <i>R,S</i> -mal) <sub>6</sub> (trz) <sub>6</sub> ]·17H <sub>2</sub> O |

FeV-co in nitrogenases

|                             |                                                                                                         |
|-----------------------------|---------------------------------------------------------------------------------------------------------|
| <b>39</b> <sup>17(+3)</sup> | VFe <sub>7</sub> S <sub>8</sub> C(CO <sub>3</sub> )[ <i>R</i> -(H)homocit] [PDB <i>5N6Y</i> ]           |
| <b>40</b> <sup>18(+3)</sup> | VFe <sub>7</sub> S <sub>7</sub> C(CO <sub>3</sub> )(OH)[ <i>R</i> -(H)homocit] [PDB <i>6FEA</i> ]       |
| <b>41</b> <sup>19(+3)</sup> | VFe <sub>7</sub> S <sub>8</sub> C(CO <sub>3</sub> )[ <i>R</i> -(H)homocit] [PDB <i>7ADR</i> ]           |
| <b>42</b> <sup>19(+3)</sup> | VFe <sub>7</sub> S <sub>7</sub> C(CO <sub>3</sub> )[ <i>R</i> -(H)homocit] [PDB <i>7ADY</i> ]           |
| <b>43</b> (+3)              | VFe <sub>7</sub> S <sub>7</sub> C(CO <sub>3</sub> )(μCO)(tCO)[ <i>R</i> -(H)homocit] [PDB <i>7AIZ</i> ] |

Abbreviation: bpz\*eaT = 2,4-bis(3,5-dimethyl-1H-pyrazol-1-yl)-6-diethylamino-1,3,5-triazine; av = average

**Table S10b.** Comparisons of selected bond distances (Å) for oxidovanadium tartrates **1** – **18**, other oxidovanadium hydroxycarboxylates **19** – **38** and reported FeV-cos **39** – **43**.

| Complexes<br>(V <sup>n+</sup> ) | V–O                    | V–O                    | V–O                    | V–N <sub>im</sub>      | C–O                    | C–O                    |
|---------------------------------|------------------------|------------------------|------------------------|------------------------|------------------------|------------------------|
|                                 | <i>α</i> -alkoxy       | <i>α</i> -hydroxy      | <i>α</i> -carboxy      |                        | <i>α</i> -alkoxy       | <i>α</i> -hydroxy      |
| <b>1</b> (+4)                   | 1.975(3) <sub>av</sub> | 2.237(3) <sub>av</sub> | 2.009(4) <sub>av</sub> | 2.128(4) <sub>av</sub> | 1.413(6) <sub>av</sub> | 1.418(6) <sub>av</sub> |
| <b>2</b> (+4)                   | 1.976(2) <sub>av</sub> |                        | 2.136(2) <sub>av</sub> | 2.117(3) <sub>av</sub> | 1.400(3) <sub>av</sub> |                        |
| <b>3</b> (+4)                   | 1.980(2) <sub>av</sub> | 2.230(2) <sub>av</sub> | 2.013(2) <sub>av</sub> | 2.124(2) <sub>av</sub> | 1.411(3) <sub>av</sub> | 1.418(3) <sub>av</sub> |
| <b>4</b> (+4)                   | 1.972(4) <sub>av</sub> |                        | 2.137(4) <sub>av</sub> | 2.120(5) <sub>av</sub> | 1.406(6) <sub>av</sub> |                        |
| <b>5</b> <sup>1</sup> (+4)      | 1.860(2) <sub>av</sub> |                        | 2.020(2) <sub>av</sub> |                        | 1.435(3) <sub>av</sub> |                        |
| <b>6</b> <sup>2</sup> (+4)      | 1.910(6) <sub>av</sub> |                        | 1.999(6) <sub>av</sub> |                        | 1.409(9) <sub>av</sub> |                        |
| <b>7</b> <sup>3</sup> (+4)      | 1.917(2) <sub>av</sub> |                        | 1.996(2) <sub>av</sub> |                        | 1.401(4) <sub>av</sub> |                        |
| <b>8</b> <sup>3</sup> (+4)      | 1.914(2) <sub>av</sub> |                        | 1.999(2) <sub>av</sub> |                        | 1.412(4) <sub>av</sub> |                        |
| <b>9</b> <sup>4</sup> (+4)      | 1.912(1) <sub>av</sub> |                        | 1.994(1) <sub>av</sub> |                        | 1.408(4) <sub>av</sub> |                        |
| <b>10</b> <sup>5</sup> (+4)     | 1.934(3) <sub>av</sub> |                        | 2.024(3) <sub>av</sub> |                        | 1.392(4) <sub>av</sub> |                        |
| <b>11</b> <sup>6</sup> (+4)     | 1.961(2) <sub>av</sub> | 2.122(2) <sub>av</sub> | 1.999(2) <sub>av</sub> |                        | 1.410(4) <sub>av</sub> | 1.428(4) <sub>av</sub> |
| <b>12</b> <sup>6</sup> (+4)     | 1.956(2) <sub>av</sub> | 2.238(2) <sub>av</sub> | 1.999(2) <sub>av</sub> |                        | 1.410(3) <sub>av</sub> | 1.425(4) <sub>av</sub> |
| <b>13</b> <sup>6</sup> (+4)     | 1.970(4) <sub>av</sub> | 2.326(4)               | 1.990(4) <sub>av</sub> |                        | 1.424(7) <sub>av</sub> | 1.441(7)               |
| <b>14</b> <sup>6</sup> (+4)     | 1.944(3) <sub>av</sub> | 2.306(3) <sub>av</sub> | 1.999(3) <sub>av</sub> |                        | 1.416(5) <sub>av</sub> | 1.428(5) <sub>av</sub> |
| <b>15</b> <sup>7</sup> (+4)     | 1.806(3) <sub>av</sub> |                        | 1.949(3) <sub>av</sub> |                        | 1.396(5) <sub>av</sub> |                        |
| <b>16</b> <sup>8</sup> (+5)     |                        | 2.272(2)               | 1.970(2)               |                        | 1.426(3)               |                        |
| <b>17</b> <sup>8</sup> (+5)     | 1.825(2) <sub>av</sub> |                        | 1.952(2) <sub>av</sub> |                        | 1.414(2) <sub>av</sub> |                        |
| <b>18</b> <sup>8</sup> (+5)     | 1.820(1) <sub>av</sub> |                        | 1.950(1) <sub>av</sub> |                        | 1.409(2) <sub>av</sub> |                        |
| <b>19</b> <sup>9</sup> (+4)     |                        | 2.231(2)               | 1.997(2)               |                        |                        | 1.422(4)               |
| <b>20</b> <sup>9</sup> (+4)     | 1.931(2)               |                        | 2.018(2)               |                        | 1.412(3)               |                        |
| <b>21</b> <sup>9</sup> (+4)     | 1.927(2)               | 2.244(2)               | 2.027(2) <sub>av</sub> |                        | 1.410(4)               | 1.413(3)               |
| <b>22</b> <sup>10</sup> (+4)    | 1.976(5) <sub>av</sub> |                        | 1.981(6)               |                        | 1.424(5) <sub>av</sub> |                        |
| <b>23</b> <sup>10</sup> (+4)    | 2.108(2) <sub>av</sub> |                        | 2.039(2)               |                        | 1.423(2) <sub>av</sub> |                        |
| <b>24</b> <sup>10</sup> (+4)    | 2.077(2) <sub>av</sub> |                        | 2.049(2) <sub>av</sub> |                        | 1.429(2) <sub>av</sub> |                        |
| <b>25</b> <sup>11</sup> (+4)    |                        | 2.197(5)               | 1.993(4)               |                        |                        | 1.440(8)               |
| <b>26</b> <sup>11</sup> (+4)    |                        | 2.209(4)               | 1.983(3)               |                        |                        | 1.451(6)               |
| <b>27</b> <sup>11</sup> (+4)    |                        | 2.109(6) <sub>av</sub> | 2.026(6) <sub>av</sub> |                        |                        | 1.433(1) <sub>av</sub> |

|                             |                        |          |                        |                        |          |
|-----------------------------|------------------------|----------|------------------------|------------------------|----------|
| <b>28</b> <sup>12(+4)</sup> |                        | 2.209(3) | 1.994(3)               |                        | 1.436(6) |
| <b>29</b> <sup>13(+5)</sup> | 2.000(3)               |          | 1.957(3)               | 1.424(5)               |          |
| <b>30</b> <sup>14(+5)</sup> | 2.026(1) <sub>av</sub> |          | 1.977(2)               | 1.422(2) <sub>av</sub> |          |
| <b>31</b> <sup>14(+5)</sup> | 1.981(2) <sub>av</sub> |          | 2.004(2)               | 1.423(2) <sub>av</sub> |          |
| <b>32</b> <sup>15(+5)</sup> | 1.851(4)               |          | 2.082(4)               | 1.432(8)               |          |
| <b>33</b> <sup>15(+5)</sup> | 1.858(1)               |          | 2.072(1)               | 1.410(2)               |          |
| <b>34</b> <sup>15(+5)</sup> | 1.858(4)               |          | 2.085(4)               | 1.410(7)               |          |
| <b>35</b> <sup>16(+5)</sup> | 1.980(8) <sub>av</sub> |          | 1.959(8) <sub>av</sub> | 1.463(8) <sub>av</sub> |          |
| <b>36</b> <sup>16(+3)</sup> | 1.992(4)               |          |                        | 1.419(7)               |          |
| <b>37</b> <sup>16(+3)</sup> | 1.994(4)               |          |                        | 1.404(8)               |          |
| <b>38</b> <sup>16(+3)</sup> | 2.005(2) <sub>av</sub> |          |                        | 1.419(4)               |          |
| <b>39</b> <sup>17(+3)</sup> |                        | 2.170    | 2.112                  | 2.304                  | 1.436    |
| <b>40</b> <sup>18(+3)</sup> |                        | 2.160    | 2.104                  | 2.251                  | 1.449    |
| <b>41</b> <sup>19(+3)</sup> |                        | 2.146    | 2.112                  | 2.267                  | 1.456    |
| <b>42</b> <sup>19(+3)</sup> |                        | 2.143    | 2.115                  | 2.263                  | 1.438    |
| <b>43</b> <sup>20(+3)</sup> |                        | 2.163    | 2.117                  | 2.270                  | 1.438    |

---

**Table S11.** Comparisons of Mo–O distances (Å) in typical molybdenum citrates with bridging sulfur/oxygen atom.

| Complexes                                                                                                                                                            | Mo–O <sub>α</sub> -alkoxy | Mo–O <sub>α</sub> - carboxy |
|----------------------------------------------------------------------------------------------------------------------------------------------------------------------|---------------------------|-----------------------------|
| Mo–μ <sub>2</sub> –S                                                                                                                                                 |                           |                             |
| K <sub>2.5</sub> Na <sub>2</sub> NH <sub>4</sub> [Mo <sup>V</sup> <sub>2</sub> O <sub>2</sub> S <sub>2</sub> (cit) <sub>2</sub> ]·5H <sub>2</sub> O <sup>21</sup>    | 2.021(8) <sub>av</sub>    | 2.130(1) <sub>av</sub>      |
| K <sub>4</sub> (NH <sub>4</sub> ) <sub>2</sub> [Mo <sup>V</sup> <sub>2</sub> O <sub>2</sub> S <sub>2</sub> (cit) <sub>2</sub> ]·10H <sub>2</sub> O <sup>22</sup>     | 1.975(8)                  | 2.199(9)                    |
| K <sub>5</sub> (NH <sub>4</sub> )[Mo <sup>V</sup> <sub>2</sub> O <sub>2</sub> S <sub>2</sub> (cit) <sub>2</sub> ]·CH <sub>3</sub> OH·5H <sub>2</sub> O <sup>23</sup> | 1.994(5) <sub>av</sub>    | 2.192(5) <sub>av</sub>      |
| Mo–μ <sub>2</sub> –O                                                                                                                                                 |                           |                             |
| (NH <sub>4</sub> ) <sub>6</sub> [Mo <sup>V</sup> <sub>2</sub> O <sub>4</sub> (cit) <sub>2</sub> ]·3H <sub>2</sub> O <sup>24</sup>                                    | 2.016(4)                  | 2.152(3)                    |



**Table S12.** Bond valence calculations for complexes  $(\text{H}_2\text{im})_2[\Delta, \Lambda\text{-V}^{\text{IV}}_2\text{O}_2(\text{R}, \text{R-H}_2\text{tart})(\text{R}, \text{R-tart})(\text{Him})_2] \cdot \text{Him}$  (**1**),  $[\Lambda, \Lambda\text{-V}^{\text{IV}}_2\text{O}_2(\text{R}, \text{R-tart})(\text{Him})_6] \cdot 4\text{H}_2\text{O}$  (**2**),  $(\text{H}_2\text{im})_2[\Lambda, \Delta\text{-V}^{\text{IV}}_2\text{O}_2(\text{S}, \text{S-H}_2\text{tart})(\text{S}, \text{S-tart})(\text{Him})_2] \cdot \text{Him}$  (**3**) and  $[\Delta, \Delta\text{-V}^{\text{IV}}_2\text{O}_2(\text{S}, \text{S-tart})(\text{Him})_6] \cdot 4\text{H}_2\text{O}$  (**4**), respectively.

| Complexes                                                                                                                                                                           | Atoms | N  | $\sum S_{ij}$ | $\Delta$ |
|-------------------------------------------------------------------------------------------------------------------------------------------------------------------------------------|-------|----|---------------|----------|
| $(\text{H}_2\text{im})_2[\Delta, \Lambda\text{-V}^{\text{IV}}_2\text{O}_2(\text{R}, \text{R-H}_2\text{tart})(\text{R}, \text{R-tart})(\text{Him})_2] \cdot \text{Him}$ ( <b>1</b> ) | V(1)  | 4+ | 4.138         | 0.138    |
|                                                                                                                                                                                     | V(2)  | 4+ | 4.148         | 0.148    |
| $[\Lambda, \Lambda\text{-V}^{\text{IV}}_2\text{O}_2(\text{R}, \text{R-tart})(\text{Him})_6] \cdot 4\text{H}_2\text{O}$ ( <b>2</b> )                                                 | V(1)  | 4+ | 4.099         | 0.099    |
|                                                                                                                                                                                     | V(2)  | 4+ | 4.162         | 0.162    |
| $(\text{H}_2\text{im})_2[\Lambda, \Delta\text{-V}^{\text{IV}}_2\text{O}_2(\text{S}, \text{S-H}_2\text{tart})(\text{S}, \text{S-tart})(\text{Him})_2] \cdot \text{Him}$ ( <b>3</b> ) | V(1)  | 4+ | 4.116         | 0.116    |
|                                                                                                                                                                                     | V(2)  | 4+ | 4.117         | 0.117    |
| $[\Delta, \Delta\text{-V}^{\text{IV}}_2\text{O}_2(\text{S}, \text{S-tart})(\text{Him})_6] \cdot 4\text{H}_2\text{O}$ ( <b>4</b> )                                                   | V(1)  | 4+ | 4.185         | 0.185    |
|                                                                                                                                                                                     | V(2)  | 4+ | 4.130         | 0.130    |

## References

1. J. G. Forrest and C. K. Prout, *J. Chem. Soc. A*, 1967, 1312–1317.
2. R. E. Tapscott, R. L. Belford and I. C. Paul, *Inorg. Chem.*, 1968, **7**, 356–364.
3. J. T. Wroblewski and M. R. Thompson, *Inorg. Chim. Acta*, 1988, **150**, 269–277.
4. J. Garcia Jaca, T. Rojo, J. L. Pizarro, A. Goñi and M. I. Arriortua, *J. Coord. Chem.*, 1993, **30**, 327–336.
5. R. B. Ortega, C. F. Campana and R. E. Tapscott, *Acta. Crystallogr. B*, 1980, **B36**, 1786–1788.
6. A. J. Cortese, B. Wilkins, M. D. Smith, J. Yeon, G. Morrison, T. T. Tran, P. S. Halasyamani and H. C. zur Loye, *Inorg. Chem.*, 2015, **54**, 4011–4020.
7. X. T. Ma, N. Xing, Z. D. Yan, X. X. Zhang, Q. Wu and Y. H. Xing, *New J. Chem.*, 2015, **39**, 1067–1074.
8. J. Galikova, P. Schwendt, J. Tatiarsky, A. S. Tracey and Z. Zak, *Inorg. Chem.*, 2009, **48**, 8423–8430.
9. W. T. Jin, H. Wang, S. Y. Wang, C. H. Dapper, X. Li, W. E. Newton, Z. H. Zhou and S. P. Cramer, *Inorg. Chem.*, 2019, **58**, 2523–2532.
10. M. Tsaramyrsi, M. Kaliva, A. Salifoglou, C. P. Raptopoulou, A. Terzis, V. Tangoulis and J. Giapintzakis, *Inorg. Chem.*, 2001, **40**, 5772–5779.
11. C. Y. Chen, M. L. Chen, H. B. Chen, H. Wang, S. P. Cramer and Z. H. Zhou, *J. Inorg. Biochem.*, 2014, **141**, 114–120.
12. V. Jodaian, M. Mirzaei, M. Arca, M. Carla Aragoni, V. Lippolis, E. Tavakoli and N. S. Langeroodi, *Inorg. Chim. Acta*, 2013, **400**, 107–114.
13. M. Tsaramyrsi, D. Kavousanaki, C. P. Raptopoulou, A. Terzis and A. Salifoglou, *Inorg. Chim. Acta*, 2001, **320**, 47–59.
14. M. Kaliva, C. P. Raptopoulou, A. Terzis and A. Salifoglou, *J. Inorg. Biochem.*, 2003, **93**, 161–173.
15. C. Y. Chen, Z. H. Zhou, H. B. Chen, P. Q. Huang, K. R. Tsai and Y. L. Chow, *Inorg. Chem.*, 2008, **47**, 8714–8720.
16. D. W. Wright, R. T. Chang, S. K. Mandal, W. H. Armstrong and W. H. Orme-Johnson, *J. Biol. Inorg. Chem.*, 1996, **1**, 143–151.
17. D. Sippel and O. Einsle, *Nat. Chem. Bio.*, 2017, **13**, 956–960.
18. D. Sippel, M. Rohde, J. Netzer, C. Trncik, J. Gies, K. Grunau, I. Djurdjevic, L. Decamps, S. L. A. Andrade and O. Einsle, *Science*, 2018, **359**, 1484–1489.
19. M. Rohde, K. Grunau and O. Einsle, *Angew. Chem. In. Ed.*, 2020, **59**, 1–6.
20. M. Rohde, K. Laun, I. Zebger, S. T. Stripp and O. Einsle, *Sci. Adv.*, 2021, **7**, eabg4474.
21. Y. H. Xing, J. Q. Xu, H. R. Sun, D. M. Li, Y. Xing, Y. H. Lin and H. Q. Jia, *Eur. J. Solid State Inorg. Chem.*, 1998, **35**, 745–756.
22. D. M. Li, Y. H. Xing, Z. C. Li, J. Q. Xu, W. B. Song, T. G. Wang, G. D. Yang, N. H. Hu, H. Q. Jia and H. M. Zhang, *J. Inorg. Biochem.*, 2005, **99**, 1602–1610.
23. J. Q. Xu, X. H. Zhou, L. M. Zhou, T. G. Wang, X. Y. Huang and B. A. Averill, *Inorg. Chim. Acta*, 1999, **285**, 152–154.
24. Z. H. Zhou, Y. F. Deng, Z. X. Cao, R. H. Zhang and Y. L. Chow, *Inorg. Chem.*,

2005, **44**, 6912–6914.
